# Supplementary material for: Cell Fate Decisions in Malignant Hematopoiesis: Leukemia Phenotype Is Determined by Distinct Functional Domains of the MN1 Oncogene
Source: PLoS One. 2014 Nov 17;9(11):e112671. doi: 10.1371/journal.pone.0112671 (PMC4234417; doi:10.1371/journal.pone.0112671)
Supplement: Table S2 — MN1 qPCR primer sequences. (DOC) [file pone.0112671.s011.doc]

**Supplementary Tables**

**Cell fate decisions in malignant hematopoiesis: Leukemia phenotype is determined by distinct functional domains of the MN1 oncogene**

Courteney K. Lai1,2, Yeonsook Moon3, Florian Kuchenbauer4,5, Daniel T. Starzcynowski6, Bob Argiropoulos7, Eric Yung1, Philip Beer1, Adrian Schwarzer8, Amit Sharma8, Gyeongsin Park9, Malina Leung1, Grace Lin1, Sarah Vollett1, Stephen Fung1, Connie J. Eaves1,2, Aly Karsan10,11, Andrew P. Weng1,11, R. Keith Humphries1,2#, Michael Heuser12#

Table S2. MN1 qPCR primer sequences

| MN1 qPCR N-term For | gtttgggctggaccaattc |
| --- | --- |
| MN1 qPCR N-term Rev | tgaacacccactttaaggcc |
| MN1 qPCR C-term For | cacttgcagtgcctgtctgt |
| MN1 qPCR C-term Rev | caacagatttgggacattcg |
