# Supplementary material for: Cell Fate Decisions in Malignant Hematopoiesis: Leukemia Phenotype Is Determined by Distinct Functional Domains of the MN1 Oncogene
Source: PLoS One. 2014 Nov 17;9(11):e112671. doi: 10.1371/journal.pone.0112671 (PMC4234417; doi:10.1371/journal.pone.0112671)
Supplement: Table S10 — Differentially Expressed Genes in MN1Δ7 cells compared to MN1 cells. (XLS) [file pone.0112671.s019.xls]

## Sheet: 130424_Toplist_MN1vsDEL7
Table S10. Differentially expressed genes in MN1 vs MN1Δ7 bone marrow cells.
probe ID	Fold-change (log2)	adj.P.Val	SYMBOL	Name
1448595_a_at	8.08489	0.000137449	Bex1	brain expressed gene 1
1421802_at	-7.35237	0.00187631	Ear1	eosinophil-associated, ribonuclease A family, member 1
1450779_at	7.06067	2.56996e-05	Fabp7	fatty acid binding protein 7, brain
1449136_at	-7.01169	0.00177721	Epx	eosinophil peroxidase
1422134_at	-6.6828	7.72877e-05	Fosb	FBJ osteosarcoma oncogene B
1417409_at	-6.04635	6.28397e-05	Jun	Jun oncogene
1422873_at	-5.97974	0.00737006	Prg2	proteoglycan 2, bone marrow
1449846_at	-5.8557	0.0025865	Ear2	eosinophil-associated, ribonuclease A family, member 2
1417852_x_at	5.67696	5.80968e-05	Clca1	chloride channel calcium activated 1
1438531_at	5.6569	0.000402129	A730054J21Rik	RIKEN cDNA A730054J21 gene
1418507_s_at	5.6479	0.00232414	Socs2	suppressor of cytokine signaling 2
1417601_at	-5.64674	0.000187582	Rgs1	regulator of G-protein signaling 1
1428642_at	5.55736	0.00323287	Slc35d3	solute carrier family 35, member D3
1417700_at	5.46727	0.000301962	Rab38	RAB38, member of RAS oncogene family
1448201_at	5.44491	0.000137727	Sfrp2	secreted frizzled-related protein 2
1422412_x_at	-5.42862	0.000431124	Ear3	eosinophil-associated, ribonuclease A family, member 3
1417749_a_at	5.33882	0.000187582	Tjp1	tight junction protein 1
1440990_at	5.2403	8.53814e-05	Kif26b	kinesin family member 26B
1423100_at	-5.15262	1.61238e-05	Fos	FBJ osteosarcoma oncogene
1430943_at	5.15251	0.000119657	6030498E09Rik	RIKEN cDNA 6030498E09 gene
1452388_at	-5.14771	0.00161143	Hspa1a	heat shock protein 1A
1447624_s_at	5.06809	0.000134794	Stox2	storkhead box 2
1448737_at	5.05101	0.000134794	Tspan7	tetraspanin 7
1439795_at	4.94797	0.000246238	Gpr64	G protein-coupled receptor 64
1449924_at	-4.9467	0.00085645	Prg3	proteoglycan 3
1419561_at	-4.88669	0.00730842	Ccl3	chemokine (C-C motif) ligand 3
1436566_at	4.84656	0.000123931	Rab40b	Rab40b, member RAS oncogene family
1448649_at	4.80008	0.0449656	Enpep	glutamyl aminopeptidase
1454997_at	4.79677	3.02576e-05	Msrb3	methionine sulfoxide reductase B3
1426640_s_at	4.7653	0.00511766	Trib2	tribbles homolog 2 (Drosophila)
1437308_s_at	4.73971	0.000187582	F2r	coagulation factor II (thrombin) receptor
1457632_s_at	4.72113	4.40021e-05	Meis2	Meis homeobox 2
1424968_at	4.65046	6.16524e-05	Ces2g	carboxylesterase 2G
1427618_at	4.62263	0.00085645	Cdh9	cadherin 9
1427126_at	-4.5759	0.00531821	Hspa1b	heat shock protein 1B
1433908_a_at	4.54337	0.00139052	Cttn	cortactin
1429274_at	4.5282	0.000481333	Lypd6b	LY6/PLAUR domain containing 6B
1437409_s_at	4.50803	0.0030964	Gpr126	G protein-coupled receptor 126
1454460_at	-4.43831	0.000134794	5730433N10Rik	RIKEN cDNA 5730433N10 gene
1420401_a_at	4.42707	0.00399524	Ramp3	receptor (calcitonin) activity modifying protein 3
1426910_at	4.42216	0.00449765	Pawr	PRKC, apoptosis, WT1, regulator
1417394_at	-4.39658	0.000701406	Klf4	Kruppel-like factor 4 (gut)
1448830_at	-4.3742	0.00025491	Dusp1	dual specificity phosphatase 1
1448890_at	-4.3693	0.000301962	Klf2	Kruppel-like factor 2 (lung)
1426801_at	4.36746	0.000180444	2008-09-01	septin 8
1417262_at	-4.35355	0.000621733	Ptgs2	prostaglandin-endoperoxide synthase 2
1442018_at	-4.32854	9.60005e-05	Btg1	B cell translocation gene 1, anti-proliferative
1419276_at	4.30449	0.00688885	Enpp1	ectonucleotide pyrophosphatase/phosphodiesterase 1
1416239_at	4.29648	0.00425491	Ass1	argininosuccinate synthetase 1
1428114_at	4.29394	0.000162522	Slc14a1	solute carrier family 14 (urea transporter), member 1
1448688_at	4.25037	0.000924659	Podxl	podocalyxin-like
1451596_a_at	4.24135	0.000411449	Sphk1	sphingosine kinase 1
1431475_a_at	4.22561	0.000119657	Hoxa10	homeobox A10
1446558_at	-4.21316	0.00124697	Dennd4a	DENN/MADD domain containing 4A
1421970_a_at	4.193	0.00031085	Gria2	glutamate receptor, ionotropic, AMPA2 (alpha 2)
1426208_x_at	4.18855	4.40021e-05	Plagl1	pleiomorphic adenoma gene-like 1
1416193_at	4.1798	8.00202e-05	Car1	carbonic anhydrase 1
1449288_at	4.11235	0.000816089	Gdf3	growth differentiation factor 3
1455813_at	4.11209	4.44635e-05	Gm13023	predicted gene 13023
1419063_at	4.10769	0.0072561	Ugt8a	UDP galactosyltransferase 8A
1422620_s_at	4.0971	0.000499858	Ppap2a	phosphatidic acid phosphatase type 2A
1424586_at	4.07402	0.000447807	Ehbp1	EH domain binding protein 1
1417507_at	4.062	5.91448e-05	Cyb561	cytochrome b-561
1449353_at	4.05134	0.00444257	Zmat3	zinc finger matrin type 3
1456700_x_at	-4.03931	0.00379322	Marcks	myristoylated alanine rich protein kinase C substrate
1418490_at	4.03216	7.81609e-05	Sdsl	serine dehydratase-like
1430923_at	4.00523	5.91448e-05	2610300M13Rik	RIKEN cDNA 2610300M13 gene
1420414_at	3.95638	5.80968e-05	Hoxa11	homeobox A11
1451563_at	-3.9556	0.00125682	Emr4	EGF-like module containing, mucin-like, hormone receptor-like sequence 4
1442000_at	3.95442	5.91448e-05	Mfsd2b	major facilitator superfamily domain containing 2B
1417403_at	3.95429	0.00229783	Elovl6	ELOVL family member 6, elongation of long chain fatty acids (yeast)
1417836_at	3.95313	6.28397e-05	Gpx7	glutathione peroxidase 7
1416514_a_at	3.9292	0.000664466	Fscn1	fascin homolog 1, actin bundling protein (Strongylocentrotus purpuratus)
1449110_at	-3.92421	0.000736447	Rhob	ras homolog gene family, member B
1448233_at	3.90395	0.000189402	Prnp	prion protein
1420468_at	3.89283	0.000733601	Asb17	ankyrin repeat and SOCS box-containing 17
1451190_a_at	3.89192	0.00099404	Sbk1	SH3-binding kinase 1
1439794_at	3.88908	0.000106341	Ntn4	netrin 4
1436127_at	3.88767	0.0165314	Crhbp	corticotropin releasing hormone binding protein
1422817_at	3.88676	0.00209222	Gp5	glycoprotein 5 (platelet)
1422804_at	3.87869	0.000106341	Serpinb6b	serine (or cysteine) peptidase inhibitor, clade B, member 6b
1444016_at	-3.85676	0.00395951	Anxa1	annexin A1
1418203_at	-3.84922	0.00434119	Pmaip1	phorbol-12-myristate-13-acetate-induced protein 1
1437263_at	3.82613	8.61423e-05	A730089K16Rik	RIKEN cDNA A730089K16 gene
1434645_at	3.818	0.000733601	C530008M17Rik	RIKEN cDNA C530008M17 gene
1419665_a_at	3.80646	0.00183987	Nupr1	nuclear protein 1
1418601_at	3.79988	0.0167495	Aldh1a7	aldehyde dehydrogenase family 1, subfamily A7
1419082_at	-3.78834	0.00186069	Serpinb2	serine (or cysteine) peptidase inhibitor, clade B, member 2
1460329_at	-3.77808	0.0033267	B4galt6	UDP-Gal:betaGlcNAc beta 1,4-galactosyltransferase, polypeptide 6
1429896_at	3.77557	0.000111316	5830408B19Rik	RIKEN cDNA 5830408B19 gene
1421811_at	-3.76805	0.0106457	Thbs1	thrombospondin 1
1444734_at	3.76757	0.000517965	A330001L22Rik	RIKEN cDNA A330001L22 gene
1452324_at	3.7627	0.0014142	Pvt1	plasmacytoma variant translocation 1
1452196_a_at	3.75787	6.13136e-05	Nckap1	NCK-associated protein 1
1417701_at	3.74727	0.000353936	Ppp1r14c	protein phosphatase 1, regulatory (inhibitor) subunit 14c
1455604_at	3.74223	0.000109788	Fzd5	frizzled homolog 5 (Drosophila)
1434036_at	3.73974	0.00186069	Mtss1	metastasis suppressor 1
1419978_s_at	3.72483	0.00259968	Arhgef25	Rho guanine nucleotide exchange factor (GEF) 25
1427000_at	3.72334	0.000187582	Hnf4a	hepatic nuclear factor 4, alpha
1419271_at	3.72249	0.00607009	Pax6	paired box gene 6
1416740_at	3.71905	0.0232944	Col5a1	collagen, type V, alpha 1
1448530_at	3.71762	0.000402129	Gmpr	guanosine monophosphate reductase
1435078_at	3.71188	5.80968e-05	Tanc2	tetratricopeptide repeat, ankyrin repeat and coiled-coil containing 2
1434601_at	3.69056	0.000187582	Amigo2	adhesion molecule with Ig like domain 2
1449984_at	-3.68472	0.000558563	Cxcl2	chemokine (C-X-C motif) ligand 2
1419767_at	3.67013	0.000106341	Padi3	peptidyl arginine deiminase, type III
1459601_at	-3.665	0.00124853	Sik1	salt inducible kinase 1
1453326_at	3.65254	0.000162522	C2cd4b	C2 calcium-dependent domain containing 4B
1439067_at	-3.64021	0.0119082	Lair1	leukocyte-associated Ig-like receptor 1
1417065_at	-3.62466	0.00236583	Egr1	early growth response 1
1453813_at	-3.59411	0.00721276	Cd200r3	CD200 receptor 3
1430165_at	-3.58961	0.000263345	Stk17b	serine/threonine kinase 17b (apoptosis-inducing)
1425919_at	-3.5809	8.97569e-05	Ndufa12	NADH dehydrogenase (ubiquinone) 1 alpha subcomplex, 12
1423858_a_at	3.57946	0.00110671	Hmgcs2	3-hydroxy-3-methylglutaryl-Coenzyme A synthase 2
1428735_at	-3.57043	0.00680324	Cd69	CD69 antigen
1455144_s_at	3.56902	0.00085645	Arhgap44	Rho GTPase activating protein 44
1436827_at	3.53954	0.00148754	Fam59a	family with sequence similarity 59, member A
1445532_at	3.53671	0.000128168	Myo16	myosin XVI
1422952_at	3.5343	0.00436574	Sapcd1	Ng23 protein
1436823_x_at	-3.52547	0.014102	Hbb-y	hemoglobin Y, beta-like embryonic chain
1460480_at	3.46244	0.00096407	Erv3	endogenous retroviral sequence 3
1423606_at	-3.45795	7.72877e-05	Postn	periostin, osteoblast specific factor
1449152_at	3.45759	0.0011899	Cdkn2b	cyclin-dependent kinase inhibitor 2B (p15, inhibits CDK4)
1423569_at	-3.42953	0.00812067	Gatm	glycine amidinotransferase (L-arginine:glycine amidinotransferase)
1428604_at	-3.40958	0.000203023	2610305D13Rik	RIKEN cDNA 2610305D13 gene
1447448_s_at	-3.40094	0.000353936	Klf6	Kruppel-like factor 6
1439610_at	3.38334	0.00827723	Rab27b	RAB27b, member RAS oncogene family
1443117_at	-3.38161	0.000621733	Eya1	eyes absent 1 homolog (Drosophila)
1418422_at	3.38077	0.000739561	Serpinb9g	serine (or cysteine) peptidase inhibitor, clade B, member 9g
1448804_at	-3.37353	0.000204031	Cyp11a1	cytochrome P450, family 11, subfamily a, polypeptide 1
1424902_at	3.37055	0.00519287	Plxdc1	plexin domain containing 1
1419759_at	3.35055	0.00798193	Abcb1a	ATP-binding cassette, sub-family B (MDR/TAP), member 1A
1456752_at	3.34578	0.0054347	Gm19544	predicted gene, 19544
1440104_at	-3.32292	0.000264084	Ranbp2	RAN binding protein 2
1427242_at	3.32155	0.000736447	Ddx4	DEAD (Asp-Glu-Ala-Asp) box polypeptide 4
1450995_at	3.31057	0.0220722	Folr1	folate receptor 1 (adult)
1455025_at	3.30614	0.00561734	Paqr9	progestin and adipoQ receptor family member IX
1419137_at	3.29301	0.000187582	Shank3	SH3/ankyrin domain gene 3
1439736_at	-3.2746	0.00148486	5830453J16Rik	RIKEN cDNA 5830453J16 gene
1434553_at	3.26812	0.000697057	Tmem56	transmembrane protein 56
1420505_a_at	3.23421	0.000739561	Stxbp1	syntaxin binding protein 1
1447655_x_at	3.22929	0.000162522	Sox6	SRY-box containing gene 6
1437217_at	3.22175	0.00265613	Ankrd6	ankyrin repeat domain 6
1430466_at	3.21938	0.00187631	2310005G13Rik	RIKEN cDNA 2310005G13 gene
1449048_s_at	3.21169	0.000187582	Rab4a	RAB4A, member RAS oncogene family
1416250_at	-3.20897	0.000301962	Btg2	B cell translocation gene 2, anti-proliferative
1448162_at	-3.20408	0.00426728	Vcam1	vascular cell adhesion molecule 1
1450380_at	3.19559	0.000642504	Epdr1	ependymin related protein 1 (zebrafish)
1451525_at	3.19332	0.000210534	Arhgap12	Rho GTPase activating protein 12
1437059_at	3.18684	0.00348514	Sox21	SRY-box containing gene 21
1416271_at	-3.18337	0.0113743	Perp	PERP, TP53 apoptosis effector
1449818_at	3.17428	0.000119657	Abcb4	ATP-binding cassette, sub-family B (MDR/TAP), member 4
1418758_a_at	3.15981	0.000612443	Cyth3	cytohesin 3
1417133_at	3.1544	0.0171409	Pmp22	peripheral myelin protein 22
1418600_at	3.1442	0.000690133	Klf1	Kruppel-like factor 1 (erythroid)
1436026_at	3.14138	0.00037605	Zfp703	zinc finger protein 703
1417483_at	-3.1214	0.000170115	Nfkbiz	nuclear factor of kappa light polypeptide gene enhancer in B cells inhibitor, zeta
1416167_at	3.1198	0.0168175	Prdx4	peroxiredoxin 4
1451535_at	3.1175	0.000821173	Il31ra	interleukin 31 receptor A
1418059_at	-3.1169	0.0304209	Eltd1	EGF, latrophilin seven transmembrane domain containing 1
1460463_at	3.112	0.0213056	H60c	histocompatibility 60c
1420338_at	-3.10819	0.00834893	Alox15	arachidonate 15-lipoxygenase
1443906_at	3.10702	0.00139052	Cd55	CD55 antigen
1433779_at	3.09769	0.000134794	Casc4	cancer susceptibility candidate 4
1427683_at	-3.09352	0.00175824	Egr2	early growth response 2
1418195_at	3.06346	0.00284892	Galnt10	UDP-N-acetyl-alpha-D-galactosamine:polypeptide N-acetylgalactosaminyltransferase 10
1450781_at	3.06267	0.00489034	Hmga2	high mobility group AT-hook 2
1424847_at	3.04893	0.000861734	Nefh	neurofilament, heavy polypeptide
1457319_at	-3.04251	7.2086e-05	A130038J17Rik	RIKEN cDNA A130038J17 gene
1419365_at	3.03809	0.00186069	Pex11a	peroxisomal biogenesis factor 11 alpha
1421855_at	-3.03209	0.0327278	Fgl2	fibrinogen-like protein 2
1423679_at	3.03204	0.000458356	2810432L12Rik	RIKEN cDNA 2810432L12 gene
1459994_x_at	3.02984	0.000499858	Trfr2	transferrin receptor 2
1421861_at	3.0266	6.85262e-05	Clstn1	calsyntenin 1
1418090_at	3.01937	0.000664466	Plvap	plasmalemma vesicle associated protein
1424426_at	3.00839	0.000187582	Mtap	methylthioadenosine phosphorylase
1425742_a_at	3.00838	0.00296817	Tsc22d1	TSC22 domain family, member 1
1436194_at	3.00819	0.000328925	Prelid2	PRELI domain containing 2
1448956_at	2.99933	0.00454425	Stard10	START domain containing 10
1419248_at	-2.99	0.000950706	Rgs2	regulator of G-protein signaling 2
1423693_at	2.98693	0.0227496	Cela1	chymotrypsin-like elastase family, member 1
1428842_a_at	2.97385	0.0011899	Ngfrap1	nerve growth factor receptor (TNFRSF16) associated protein 1
1433776_at	2.97269	0.0246359	Lhfp	lipoma HMGIC fusion partner
1447623_s_at	2.97193	0.0458911	Prkd1	protein kinase D1
1417061_at	2.96707	0.00085645	Slc40a1	solute carrier family 40 (iron-regulated transporter), member 1
1439153_at	-2.96675	0.0037172	Rnf144b	ring finger protein 144B
1421840_at	2.96479	0.00454868	Abca1	ATP-binding cassette, sub-family A (ABC1), member 1
1429189_at	-2.9629	0.0209869	Arsb	arylsulfatase B
1440165_at	-2.95386	0.00148486	Ptprc	protein tyrosine phosphatase, receptor type, C
1442700_at	-2.94887	0.00372149	Pde4b	phosphodiesterase 4B, cAMP specific
1426951_at	2.93726	0.000630684	Crim1	cysteine rich transmembrane BMP regulator 1 (chordin like)
1454622_at	2.93167	0.00119938	Slc38a5	solute carrier family 38, member 5
1430886_at	2.92732	0.00139052	1700112E06Rik	RIKEN cDNA 1700112E06 gene
1423948_at	2.92413	0.000686003	Bag2	BCL2-associated athanogene 2
1436155_at	2.92338	0.00372149	Nmnat2	nicotinamide nucleotide adenylyltransferase 2
1427482_a_at	2.91777	0.00788087	Car8	carbonic anhydrase 8
1430439_at	-2.91359	0.0151641	Mctp1	multiple C2 domains, transmembrane 1
1429950_at	2.9072	0.00852522	Unc5cl	unc-5 homolog C (C. elegans)-like
1460192_at	2.90408	0.00157729	Osbpl1a	oxysterol binding protein-like 1A
1420704_at	-2.90324	0.00124697	Csf2ra	colony stimulating factor 2 receptor, alpha, low-affinity (granulocyte-macrophage)
1424698_s_at	-2.90213	0.00461375	Gca	grancalcin
1423059_at	2.89763	0.000463565	Ptk2	PTK2 protein tyrosine kinase 2
1451888_a_at	2.89273	0.00151625	Odz4	odd Oz/ten-m homolog 4 (Drosophila)
1453840_at	-2.88983	0.0115977	Pabpc1	poly(A) binding protein, cytoplasmic 1
1439512_at	-2.88981	0.000237285	5830444B04Rik	RIKEN cDNA 5830444B04 gene
1459961_a_at	-2.88277	0.000660006	Stat3	signal transducer and activator of transcription 3
1418288_at	2.87433	0.0201315	Lpin1	lipin 1
1416203_at	2.86797	0.00186069	Aqp1	aquaporin 1
1448261_at	-2.86733	0.000150419	Cdh1	cadherin 1
1446498_at	2.86242	0.00511766	Il20ra	interleukin 20 receptor, alpha
1460616_at	-2.86117	0.0427891	Slco4c1	solute carrier organic anion transporter family, member 4C1
1427419_x_at	2.85527	0.0030359	Ccr9	chemokine (C-C motif) receptor 9
1435393_at	2.85177	0.00135553	Mc1r	melanocortin 1 receptor
1451313_a_at	-2.85039	0.00643429	1110067D22Rik	RIKEN cDNA 1110067D22 gene
1422316_at	2.84178	0.000686003	Gp1ba	glycoprotein 1b, alpha polypeptide
1427547_a_at	-2.83972	0.000106341	Slc26a3	solute carrier family 26, member 3
1416842_at	2.82408	0.0128036	Gstm5	glutathione S-transferase, mu 5
1423274_at	2.82315	0.000631065	Ints6	integrator complex subunit 6
1438239_at	-2.8168	0.00426728	Mid1	midline 1
1452519_a_at	-2.81662	0.000595962	Zfp36	zinc finger protein 36
1435551_at	2.81647	0.000612443	Fhod3	formin homology 2 domain containing 3
1436168_at	2.81513	0.0038643	C730029A08Rik	RIKEN cDNA C730029A08 gene
1438767_at	-2.81393	0.000284985	Osm	oncostatin M
1424030_at	2.80922	0.000736447	Grhl1	grainyhead-like 1 (Drosophila)
1418511_at	2.80703	0.00670437	Dpt	dermatopontin
1450044_at	2.786	0.00119938	Fzd7	frizzled homolog 7 (Drosophila)
1418128_at	2.78471	0.000621733	Adcy6	adenylate cyclase 6
1420678_a_at	-2.78185	0.000266706	Il17rb	interleukin 17 receptor B
1440162_x_at	-2.76857	0.0493509	Edaradd	EDAR (ectodysplasin-A receptor)-associated death domain
1448471_a_at	2.76784	0.00607009	Ctla2a	cytotoxic T lymphocyte-associated protein 2 alpha
1416930_at	2.76743	0.0189362	Ly6d	lymphocyte antigen 6 complex, locus D
1428535_at	2.76606	0.00516045	9430020K01Rik	RIKEN cDNA 9430020K01 gene
1456057_x_at	2.75071	0.00891931	Tmem109	transmembrane protein 109
1416445_at	2.74071	0.00125682	Fam98a	family with sequence similarity 98, member A
1440370_at	-2.73498	0.0162899	Abca13	ATP-binding cassette, sub-family A (ABC1), member 13
1418752_at	2.73058	0.0422198	Aldh3a1	aldehyde dehydrogenase family 3, subfamily A1
1436202_at	-2.723	0.000664466	Malat1	metastasis associated lung adenocarcinoma transcript 1 (non-coding RNA)
1427233_at	2.7223	0.000162522	Tshz1	teashirt zinc finger family member 1
1423835_at	2.71777	0.00124697	Zfp503	zinc finger protein 503
1459253_at	-2.70805	0.00037605	1700023H06Rik	RIKEN cDNA 1700023H06 gene
1418901_at	-2.70503	0.0120262	Cebpb	CCAAT/enhancer binding protein (C/EBP), beta
1431394_a_at	-2.70296	0.00643429	Lrrk2	leucine-rich repeat kinase 2
1424713_at	2.69754	0.00137479	Calml4	calmodulin-like 4
1417268_at	-2.69127	0.0334616	Cd14	CD14 antigen
1430642_at	2.68759	0.00860108	2900001G08Rik	RIKEN cDNA 2900001G08 gene
1425029_a_at	2.67538	0.00803551	Mboat2	membrane bound O-acyltransferase domain containing 2
1442945_at	-2.67404	0.0236021	2010109K09Rik	RIKEN cDNA 2010109K09 gene
1453636_at	-2.67391	0.000924659	Pcgf5	polycomb group ring finger 5
1434928_at	2.67193	0.00139052	Gas2l1	growth arrest-specific 2 like 1
1424367_a_at	2.67011	0.00413798	Homer2	homer homolog 2 (Drosophila)
1454630_at	2.66514	0.000922408	Samd14	sterile alpha motif domain containing 14
1441315_s_at	2.66382	0.00173219	Slc19a2	solute carrier family 19 (thiamine transporter), member 2
1435281_at	2.65733	0.0119522	Cpt1c	carnitine palmitoyltransferase 1c
1428706_at	2.65533	0.000977288	Cenpv	centromere protein V
1422920_at	2.6552	0.00412273	Cldn13	claudin 13
1419470_at	2.65395	0.00643429	Gnb4	guanine nucleotide binding protein (G protein), beta 4
1422189_x_at	2.6513	0.00085645	Tcrg-V4	T cell receptor gamma, variable 4
1444396_at	-2.65066	0.000924659	Trp53inp2	transformation related protein 53 inducible nuclear protein 2
1428471_at	2.6503	0.000612443	Sorbs1	sorbin and SH3 domain containing 1
1434864_at	2.64868	0.000114383	Nipa1	non imprinted in Prader-Willi/Angelman syndrome 1 homolog (human)
1418102_at	2.64826	0.000493037	Hes1	hairy and enhancer of split 1 (Drosophila)
1453386_at	-2.64084	0.0030359	Tusc1	tumor suppressor candidate 1
1440850_at	-2.63833	0.00124697	Rlim	ring finger protein, LIM domain interacting
1458345_s_at	2.6367	0.017668	Colec11	collectin sub-family member 11
1437917_at	-2.63619	0.000162522	D530037H12Rik	RIKEN cDNA D530037H12 gene
1439260_a_at	2.63614	0.0365963	Enpp3	ectonucleotide pyrophosphatase/phosphodiesterase 3
1419534_at	-2.63479	0.0319373	Olr1	oxidized low density lipoprotein (lectin-like) receptor 1
1434960_at	2.63346	0.000301962	Taf9b	TAF9B RNA polymerase II, TATA box binding protein (TBP)-associated factor
1428074_at	2.62351	0.00209222	Tmem158	transmembrane protein 158
1455607_at	2.62062	0.00227371	Rspo3	R-spondin 3 homolog (Xenopus laevis)
1443814_x_at	-2.6198	0.0388111	Ctsh	cathepsin H
1417400_at	2.61553	0.0029652	Rai14	retinoic acid induced 14
1418536_at	-2.61169	0.0127938	H2-Q7	histocompatibility 2, Q region locus 7
1416850_s_at	2.61155	0.00232905	Cisd1	CDGSH iron sulfur domain 1
1441071_at	-2.60147	0.018681	Kcnq5	potassium voltage-gated channel, subfamily Q, member 5
1447284_at	-2.60089	0.00423528	Trem1	triggering receptor expressed on myeloid cells 1
1430526_a_at	2.60084	0.000489164	Smarca2	SWI/SNF related, matrix associated, actin dependent regulator of chromatin, subfamily a, member 2
1447836_x_at	2.59434	0.0101753	4921525O09Rik	RIKEN cDNA 4921525O09 gene
1458051_at	-2.59397	0.0130731	A230048O21Rik	RIKEN cDNA A230048O21 gene
1455304_at	2.59179	0.000697057	Unc13c	unc-13 homolog C (C. elegans)
1455826_a_at	-2.59039	0.00215829	Bace1	beta-site APP cleaving enzyme 1
1449269_at	-2.58904	0.0123145	F5	coagulation factor V
1422977_at	2.58588	0.00436574	Gp1bb	glycoprotein Ib, beta polypeptide
1434496_at	-2.5857	0.00111586	Plk3	polo-like kinase 3 (Drosophila)
1440840_at	-2.58004	0.0137346	D630004K10Rik	RIKEN cDNA D630004K10 gene
1424383_at	2.57793	0.00991823	Tmem51	transmembrane protein 51
1447046_at	-2.57717	0.00564418	Ucp2	uncoupling protein 2 (mitochondrial, proton carrier)
1420399_at	2.57623	0.000736447	Gfi1b	growth factor independent 1B
1455466_at	2.57363	0.000187582	Gpr133	G protein-coupled receptor 133
1434248_at	2.57292	0.00158005	Prkch	protein kinase C, eta
1426807_at	-2.56985	0.00346508	Lta4h	leukotriene A4 hydrolase
1433683_at	2.56922	0.000301962	Esrp2	epithelial splicing regulatory protein 2
1456777_at	-2.56516	0.0297537	Mgam	maltase-glucoamylase
1443768_at	-2.56483	0.000301962	Rhoa	ras homolog gene family, member A
1451230_a_at	2.56457	0.00145845	Wbp5	WW domain binding protein 5
1424880_at	-2.56118	0.000733601	Trib1	tribbles homolog 1 (Drosophila)
1438052_at	-2.5592	0.00196374	A130071D04Rik	RIKEN cDNA A130071D04 gene
1441115_at	-2.55762	0.00637441	D18Ertd232e	DNA segment, Chr 18, ERATO Doi 232, expressed
1443490_at	-2.55446	0.000725721	D3Ertd34e	DNA segment, Chr 3, ERATO Doi 34, expressed
1422601_at	2.54584	0.000831904	Serpinb9	serine (or cysteine) peptidase inhibitor, clade B, member 9
1432431_s_at	2.53525	0.00434119	Macrod2	MACRO domain containing 2
1424987_at	-2.53009	0.000922367	5430435G22Rik	RIKEN cDNA 5430435G22 gene
1420821_at	-2.52906	0.0357754	Sgpp1	sphingosine-1-phosphate phosphatase 1
1418488_s_at	2.52682	0.00874184	Ripk4	receptor-interacting serine-threonine kinase 4
1452532_x_at	-2.52627	0.00511766	Ceacam1	carcinoembryonic antigen-related cell adhesion molecule 1
1433110_at	-2.51893	0.0131371	5830474E16Rik	RIKEN cDNA 5830474E16 gene
1432750_at	2.51177	0.00490288	Zfp711	zinc finger protein 711
1453047_at	2.50284	0.0173064	Tspo2	translocator protein 2
1437403_at	2.5008	0.000969905	Samd5	sterile alpha motif domain containing 5
1418531_at	-2.49996	0.000301962	Oosp1	oocyte secreted protein 1
1425216_at	-2.49902	0.0274713	Ffar2	free fatty acid receptor 2
1435148_at	2.49843	0.00489904	Atp1b2	ATPase, Na+/K+ transporting, beta 2 polypeptide
1445522_at	-2.49579	0.0181611	Atp8b4	ATPase, class I, type 8B, member 4
1438659_x_at	2.49266	0.00236533	Chchd6	coiled-coil-helix-coiled-coil-helix domain containing 6
1419874_x_at	-2.48225	0.00170173	Zbtb16	zinc finger and BTB domain containing 16
1416022_at	2.48187	0.00124697	Fabp5	fatty acid binding protein 5, epidermal
1424349_a_at	-2.48126	0.0100721	Lpgat1	lysophosphatidylglycerol acyltransferase 1
1422536_at	2.47968	0.00183987	Tnni3	troponin I, cardiac 3
1421297_a_at	2.47245	0.00414609	Cacna1c	calcium channel, voltage-dependent, L type, alpha 1C subunit
1423902_s_at	2.44956	0.000458356	Arhgef12	Rho guanine nucleotide exchange factor (GEF) 12
1441381_at	-2.44669	0.000664466	9430029E18Rik	RIKEN cDNA 9430029E18 gene
1449459_s_at	2.44279	0.00099404	Asb13	ankyrin repeat and SOCS box-containing 13
1415834_at	-2.44214	0.0194243	Dusp6	dual specificity phosphatase 6
1449088_at	2.43917	0.0151641	Fbp2	fructose bisphosphatase 2
1415899_at	-2.43751	0.000137727	Junb	Jun-B oncogene
1449389_at	2.4335	0.00181345	Tal1	T cell acute lymphocytic leukemia 1
1416442_at	-2.43308	0.0011899	Ier2	immediate early response 2
1416882_at	2.42941	0.0177768	Rgs10	regulator of G-protein signalling 10
1440859_at	2.42924	0.0112963	Akap6	A kinase (PRKA) anchor protein 6
1452249_at	2.42876	0.00276328	Prickle1	prickle homolog 1 (Drosophila)
1418749_at	2.42125	0.000137727	Psd3	pleckstrin and Sec7 domain containing 3
1436818_a_at	2.41907	0.000187582	Msi2	Musashi homolog 2 (Drosophila)
1422978_at	-2.41491	0.0354606	Cybb	cytochrome b-245, beta polypeptide
1417694_at	2.41286	0.00204547	Gab1	growth factor receptor bound protein 2-associated protein 1
1417600_at	2.40957	0.0110862	Slc15a2	solute carrier family 15 (H+/peptide transporter), member 2
1431552_at	-2.40539	0.0111698	1810006J02Rik	RIKEN cDNA 1810006J02 gene
1460147_at	-2.40147	0.00247009	A730009E18Rik	RIKEN cDNA A730009E18 gene
1415761_at	2.40014	0.0155632	Mrpl52	mitochondrial ribosomal protein L52
1438452_at	-2.39957	0.0101557	Nebl	nebulette
1456641_at	2.39693	0.00423528	1190007F08Rik	RIKEN cDNA 1190007F08 gene
1436994_a_at	-2.39687	0.00175824	Hist1h1c	histone cluster 1, H1c
1417276_at	2.3968	0.000121695	Tulp2	tubby-like protein 2
1438306_at	2.39601	0.000666129	Rnf180	ring finger protein 180
1449937_at	2.39253	0.00564418	Endou	endonuclease, polyU-specific
1427628_at	2.38993	0.00423629	Trbv13-2	T cell receptor beta, variable 13-2
1420994_at	-2.38797	0.0248042	B3gnt5	UDP-GlcNAc:betaGal beta-1,3-N-acetylglucosaminyltransferase 5
1416780_at	2.38199	0.00262722	Pfkm	phosphofructokinase, muscle
1425281_a_at	-2.37699	0.00868365	Tsc22d3	TSC22 domain family, member 3
1424800_at	-2.37125	0.00151625	Enah	enabled homolog (Drosophila)
1439997_at	-2.37076	0.00148292	Synj1	synaptojanin 1
1442292_at	-2.37009	0.00479349	Arhgef6	Rac/Cdc42 guanine nucleotide exchange factor (GEF) 6
1424893_at	-2.36988	0.00523171	Ndel1	nuclear distribution gene E-like homolog 1 (A. nidulans)
1450734_at	-2.3655	0.0205122	Sec16b	SEC16 homolog B (S. cerevisiae)
1419538_at	2.36449	0.00522357	Flt3	FMS-like tyrosine kinase 3
1418314_a_at	2.36106	0.00189909	Rbfox1	RNA binding protein, fox-1 homolog (C. elegans) 1
1417389_at	-2.3582	0.00876556	Gpc1	glypican 1
1437079_at	2.35595	0.00587502	Slc18a2	solute carrier family 18 (vesicular monoamine), member 2
1457032_at	2.35444	0.00349829	Ak5	adenylate kinase 5
1421307_at	2.35272	0.00711749	Car13	carbonic anhydrase 13
1442542_at	2.34831	0.00157806	Eya4	eyes absent 4 homolog (Drosophila)
1435679_at	2.34327	0.00037605	Optn	optineurin
1449232_at	2.34107	0.000721819	Gata1	GATA binding protein 1
1424254_at	-2.33819	0.000816089	Ifitm1	interferon induced transmembrane protein 1
1455692_x_at	-2.3372	0.0136142	1700097N02Rik	RIKEN cDNA 1700097N02 gene
1427484_at	-2.33718	0.000533722	Eml5	echinoderm microtubule associated protein like 5
1419700_a_at	-2.33562	0.0320957	Prom1	prominin 1
1455324_at	-2.32762	0.000922367	Plcxd2	phosphatidylinositol-specific phospholipase C, X domain containing 2
1427049_s_at	2.32582	0.000612443	Smo	smoothened homolog (Drosophila)
1458667_at	2.32572	0.00469421	Ninl	ninein-like
1421578_at	-2.32426	0.00187631	Ccl4	chemokine (C-C motif) ligand 4
1439960_at	2.32173	0.00025491	Rpusd2	RNA pseudouridylate synthase domain containing 2
1457043_at	2.31859	0.000621733	B3galtl	beta 1,3-galactosyltransferase-like
1453282_at	2.31772	0.00312207	Cxadr	coxsackie virus and adenovirus receptor
1419144_at	2.31292	0.00412949	Cd163	CD163 antigen
1441693_at	2.31008	0.00161751	Adamts3	a disintegrin-like and metallopeptidase (reprolysin type) with thrombospondin type 1 motif, 3
1418186_at	2.30824	0.000697057	Gstt1	glutathione S-transferase, theta 1
1428942_at	2.30624	0.0115457	Mt2	metallothionein 2
1418712_at	2.30614	0.00393501	Cdc42ep5	CDC42 effector protein (Rho GTPase binding) 5
1426981_at	2.30506	0.000797205	Pcsk6	proprotein convertase subtilisin/kexin type 6
1415698_at	2.30388	0.00458897	Golm1	golgi membrane protein 1
1445229_at	-2.30286	0.00483224	Dgat1	diacylglycerol O-acyltransferase 1
1436448_a_at	-2.30276	0.0423494	Ptgs1	prostaglandin-endoperoxide synthase 1
1435386_at	2.29669	0.00316193	Vwf	Von Willebrand factor homolog
1451117_a_at	2.29186	0.000736447	Tom1l1	target of myb1-like 1 (chicken)
1439998_at	-2.28871	0.00607009	Jmjd1c	jumonji domain containing 1C
1439238_at	-2.28565	0.00107661	Sun2	Sad1 and UNC84 domain containing 2
1455195_at	2.28353	0.000431124	Rps24	ribosomal protein S24
1449254_at	-2.28275	0.000775287	Spp1	secreted phosphoprotein 1
1451968_at	2.28108	0.00037605	Xrcc5	X-ray repair complementing defective repair in Chinese hamster cells 5
1439304_at	-2.27722	0.0113743	B230216N24Rik	RIKEN cDNA B230216N24 gene
1451046_at	2.27316	0.00316601	Zfpm1	zinc finger protein, multitype 1
1429385_at	2.26988	0.00133024	Dcaf7	DDB1 and CUL4 associated factor 7
1438160_x_at	-2.26752	0.0248479	Slco4a1	solute carrier organic anion transporter family, member 4a1
1422930_at	2.26605	0.00343998	Icam4	intercellular adhesion molecule 4, Landsteiner-Wiener blood group
1438892_at	-2.26485	0.00885367	Dep1	diabetic embryopathy 1
1431089_at	2.26475	0.000831904	Cpsf2	cleavage and polyadenylation specific factor 2
1426663_s_at	2.2551	0.0154803	Slc45a3	solute carrier family 45, member 3
1417730_at	2.24967	0.0144898	Ext1	exostoses (multiple) 1
1455040_s_at	-2.24477	0.0345455	Nhsl2	NHS-like 2
1449117_at	-2.2414	0.00323287	Jund	Jun proto-oncogene related gene d
1434539_at	-2.23991	0.000701406	Lrrn3	leucine rich repeat protein 3, neuronal
1436122_at	2.23942	0.00136396	Zfp667	zinc finger protein 667
1451375_at	2.23209	0.00104282	Ehf	ets homologous factor
1436534_at	2.23206	0.0025865	Trove2	TROVE domain family, member 2
1435323_a_at	-2.23085	0.00143898	Mboat1	membrane bound O-acyltransferase domain containing 1
1449965_at	-2.22849	0.00495391	Mcpt8	mast cell protease 8
1450474_at	2.22802	0.000362106	Serpinb9c	serine (or cysteine) peptidase inhibitor, clade B, member 9c
1434738_at	2.22541	0.000664466	Tarsl2	threonyl-tRNA synthetase-like 2
1450753_at	-2.22512	0.0134938	Nkg7	natural killer cell group 7 sequence
1449334_at	2.22387	0.00236533	Timp3	tissue inhibitor of metalloproteinase 3
1429891_at	-2.21817	0.0101194	Capsl	calcyphosine-like
1450140_a_at	2.21682	0.0068938	Cdkn2a	cyclin-dependent kinase inhibitor 2A
1417566_at	-2.21399	0.00661077	Abhd5	abhydrolase domain containing 5
1438055_at	2.21363	0.01892	Rarres1	retinoic acid receptor responder (tazarotene induced) 1
1459992_x_at	2.21289	0.00321462	Cln8	ceroid-lipofuscinosis, neuronal 8
1417323_at	2.20919	0.0289623	Psrc1	proline/serine-rich coiled-coil 1
1424780_a_at	-2.20652	0.0218077	Reep3	receptor accessory protein 3
1455626_at	2.2003	0.00316903	Hoxa9	homeobox A9
1449390_at	2.19779	0.00148486	Gpatch4	G patch domain containing 4
1452353_at	2.1953	0.00524657	Gpr155	G protein-coupled receptor 155
1419411_at	2.19295	0.00189909	Tac2	tachykinin 2
1456328_at	-2.19206	0.0447896	Bank1	B cell scaffold protein with ankyrin repeats 1
1442087_at	-2.18592	0.00146134	H3f3a	H3 histone, family 3A
1431218_at	-2.18453	0.00220751	Zdhhc20	zinc finger, DHHC domain containing 20
1449078_at	2.18371	0.000473002	St3gal6	ST3 beta-galactoside alpha-2,3-sialyltransferase 6
1416410_at	2.18166	0.0385345	Pafah1b3	platelet-activating factor acetylhydrolase, isoform 1b, subunit 3
1441962_at	-2.17511	0.0272918	Alox5	arachidonate 5-lipoxygenase
1442971_at	-2.17448	0.00129865	Baz2b	bromodomain adjacent to zinc finger domain, 2B
1417461_at	-2.16937	0.0025865	Cap1	CAP, adenylate cyclase-associated protein 1 (yeast)
1421366_at	-2.1675	0.0306146	Clec5a	C-type lectin domain family 5, member a
1445534_at	-2.16748	0.000664466	Flnb	filamin, beta
1453317_a_at	2.16615	0.00918757	Khdrbs3	KH domain containing, RNA binding, signal transduction associated 3
1444482_at	-2.16517	0.000162522	A130078K24Rik	RIKEN cDNA A130078K24 gene
1419286_s_at	2.16261	0.0173755	Ift81	intraflagellar transport 81 homolog (Chlamydomonas)
1458701_at	-2.16113	0.039937	Gpcpd1	glycerophosphocholine phosphodiesterase GDE1 homolog (S. cerevisiae)
1418733_at	2.15969	0.00426728	Twist1	twist homolog 1 (Drosophila)
1445273_at	-2.15943	0.00614091	D10Ertd638e	DNA segment, Chr 10, ERATO Doi 638, expressed
1452982_at	-2.15922	0.00700672	Igf1r	insulin-like growth factor I receptor
1423350_at	2.15896	0.0146385	Socs5	suppressor of cytokine signaling 5
1421923_at	-2.15825	0.018681	Sh3bp5	SH3-domain binding protein 5 (BTK-associated)
1430316_at	2.15516	0.000187582	Ispd	isoprenoid synthase domain containing
1419647_a_at	-2.15404	0.000288761	Ier3	immediate early response 3
1459045_at	-2.1508	0.0330856	Golim4	golgi integral membrane protein 4
1433581_at	2.14958	0.00148102	1190002N15Rik	RIKEN cDNA 1190002N15 gene
1430080_at	-2.14938	0.0193737	Fcnb	ficolin B
1456087_at	2.14937	0.00674553	Nfia	nuclear factor I/A
1456806_at	-2.14867	0.000397651	A130010C12Rik	RIKEN cDNA A130010C12 gene
1433486_at	2.14787	0.000791647	Clcn3	chloride channel 3
1450802_at	-2.14702	0.00362108	Prss28	protease, serine, 28
1451604_a_at	-2.14508	0.00537898	Acvrl1	activin A receptor, type II-like 1
1434593_at	2.14411	0.00133024	Eif5a2	eukaryotic translation initiation factor 5A2
1419032_at	-2.14214	0.0209368	2610018G03Rik	RIKEN cDNA 2610018G03 gene
1444003_at	-2.1415	0.00700672	Neurl3	neuralized homolog 3 homolog (Drosophila)
1429672_at	-2.14099	0.00132665	5830407E08Rik	RIKEN cDNA 5830407E08 gene
1433735_a_at	2.13947	0.0194	Tmem64	transmembrane protein 64
1421498_a_at	2.13856	0.00024418	2010204K13Rik	RIKEN cDNA 2010204K13 gene
1436729_at	-2.13767	0.0039297	Afap1	actin filament associated protein 1
1452026_a_at	2.13625	0.00835513	Pla2g12a	phospholipase A2, group XIIA
1438619_x_at	2.13566	0.00621235	Zdhhc14	zinc finger, DHHC domain containing 14
1449363_at	-2.13452	0.00692633	Atf3	activating transcription factor 3
1459807_x_at	2.13412	0.0029083	P4htm	prolyl 4-hydroxylase, transmembrane (endoplasmic reticulum)
1452163_at	-2.13239	0.048851	Ets1	E26 avian leukemia oncogene 1, 5' domain
1448979_at	2.12992	0.0029652	Muted	muted
1455870_at	2.12606	0.0203216	Akap2	A kinase (PRKA) anchor protein 2
1438972_x_at	2.12456	0.0226166	2810410L24Rik	RIKEN cDNA 2810410L24 gene
1435490_at	-2.12333	0.0410943	Hk3	hexokinase 3
1435331_at	-2.12181	0.0220722	Pyhin1	pyrin and HIN domain family, member 1
1446398_at	2.1199	0.00285421	LOC433197	uncharacterized LOC433197
1442263_at	2.11806	0.0177792	Rgs13	regulator of G-protein signaling 13
1453462_at	-2.11766	0.00412884	Chst13	carbohydrate (chondroitin 4) sulfotransferase 13
1417804_at	-2.11576	0.0205494	Rasgrp2	RAS, guanyl releasing protein 2
1437627_at	2.11532	0.0011899	Mex3d	mex3 homolog D (C. elegans)
1456256_at	-2.11525	0.00694359	Eif5	eukaryotic translation initiation factor 5
1434456_at	2.11471	0.0217021	Rundc3b	RUN domain containing 3B
1430097_at	-2.11116	0.000628162	8430436C05Rik	RIKEN cDNA 8430436C05 gene
1457722_at	-2.11072	0.0131403	Klrb1f	killer cell lectin-like receptor subfamily B member 1F
1430182_a_at	2.10373	0.00763282	1700006J14Rik	RIKEN cDNA 1700006J14 gene
1428823_at	2.10337	0.000996329	Hddc2	HD domain containing 2
1419721_at	-2.10217	0.00611995	Niacr1	niacin receptor 1
1424239_at	2.0983	0.000664466	Fam65a	family with sequence similarity 65, member A
1433205_at	-2.09749	0.000701406	Ndfip2	Nedd4 family interacting protein 2
1417689_a_at	2.09748	0.00714549	Pdzk1ip1	PDZK1 interacting protein 1
1458516_at	-2.09675	0.0215176	Nckap1l	NCK associated protein 1 like
1452160_at	-2.09655	0.00236533	Tiparp	TCDD-inducible poly(ADP-ribose) polymerase
1435176_a_at	-2.09205	0.00791131	Id2	inhibitor of DNA binding 2
1450699_at	2.09151	0.0172871	Selenbp1	selenium binding protein 1
1458648_at	-2.09108	0.000433653	AU042950	expressed sequence AU042950
1436739_at	2.08944	0.0366282	Agtr1a	angiotensin II receptor, type 1a
1421654_a_at	2.08512	0.00139052	Lmna	lamin A
1417679_at	-2.08244	0.0209869	Gfi1	growth factor independent 1
1440007_at	2.08242	0.000719461	D930003E18Rik	RIKEN cDNA D930003E18 gene
1431377_at	-2.08234	0.0129977	Atxn10	ataxin 10
1444599_at	-2.08005	0.0169747	Herc4	hect domain and RLD 4
1439114_at	-2.07773	0.0238697	Ddx60	DEAD (Asp-Glu-Ala-Asp) box polypeptide 60
1439917_at	-2.07532	0.000733601	Pdzd8	PDZ domain containing 8
1434990_at	2.07409	0.00587502	Ppm1e	protein phosphatase 1E (PP2C domain containing)
1418072_at	-2.06985	0.00211302	Hist1h2bc	histone cluster 1, H2bc
1416939_at	2.06718	0.00584424	Ppa1	pyrophosphatase (inorganic) 1
1426942_at	2.06247	0.0288239	Aim1	absent in melanoma 1
1434273_at	2.06218	0.0178532	Fam174b	family with sequence similarity 174, member B
1424214_at	2.06122	0.0107948	Parm1	prostate androgen-regulated mucin-like protein 1
1419028_at	2.05441	0.021407	Arpp21	cyclic AMP-regulated phosphoprotein, 21
1442077_at	-2.05426	0.00229062	2310076G05Rik	RIKEN cDNA 2310076G05 gene
1451628_a_at	2.05422	0.00119938	Ank3	ankyrin 3, epithelial
1447275_at	2.05243	0.00109444	Bbs12	Bardet-Biedl syndrome 12 (human)
1451386_at	2.05217	0.01126	Blvrb	biliverdin reductase B (flavin reductase (NADPH))
1429590_at	-2.05078	0.00133024	Tacc1	transforming, acidic coiled-coil containing protein 1
1446528_at	-2.04905	0.0117244	Scyl2	SCY1-like 2 (S. cerevisiae)
1425506_at	-2.0482	0.00708194	Mylk	myosin, light polypeptide kinase
1429064_at	2.04698	0.00296867	Dip2c	DIP2 disco-interacting protein 2 homolog C (Drosophila)
1437111_at	2.0465	0.017703	Zc3h12c	zinc finger CCCH type containing 12C
1441352_at	-2.04583	0.00128188	9430034N14Rik	RIKEN cDNA 9430034N14 gene
1460167_at	2.04097	0.0184725	Aldh7a1	aldehyde dehydrogenase family 7, member A1
1417780_at	2.04008	0.00366491	Lass4	LAG1 homolog, ceramide synthase 4
1431947_at	-2.04	0.00186069	Ldlr	low density lipoprotein receptor
1444373_at	-2.03857	0.00621235	Tiam1	T cell lymphoma invasion and metastasis 1
1438672_at	2.03636	0.00633646	Parvb	parvin, beta
1424032_at	-2.03558	0.008975	Hvcn1	hydrogen voltage-gated channel 1
1418412_at	2.03522	0.0290561	Tpd52l1	tumor protein D52-like 1
1423718_at	2.03367	0.00996166	Ak3	adenylate kinase 3
1424076_at	2.03285	0.0216226	Gdpd1	glycerophosphodiester phosphodiesterase domain containing 1
1443941_at	-2.03138	0.00085645	Ccdc149	coiled-coil domain containing 149
1431894_at	-2.03103	0.00158005	Itprip	inositol 1,4,5-triphosphate receptor interacting protein
1424126_at	-2.03017	0.0186797	Alas1	aminolevulinic acid synthase 1
1423680_at	2.02985	0.00186069	Fads1	fatty acid desaturase 1
1416229_at	2.02803	0.00259488	Rfk	riboflavin kinase
1429428_at	2.02626	0.00204477	Tcf7l2	transcription factor 7 like 2, T cell specific, HMG box
1449002_at	2.02622	0.00733706	Phlda3	pleckstrin homology-like domain, family A, member 3
1448752_at	2.0163	0.00215829	Car2	carbonic anhydrase 2
1453622_s_at	2.01564	0.00531821	Mllt3	myeloid/lymphoid or mixed-lineage leukemia (trithorax homolog, Drosophila); translocated to, 3
1449991_at	-2.01512	0.0128038	Cd244	CD244 natural killer cell receptor 2B4
1423478_at	-2.013	0.0144544	Prkcb	protein kinase C, beta
1416292_at	2.01237	0.000719461	Prdx3	peroxiredoxin 3
1457117_at	-2.01037	0.00370404	Nfe2l2	nuclear factor, erythroid derived 2, like 2
1415822_at	2.00879	0.0059631	Scd2	stearoyl-Coenzyme A desaturase 2
1450344_a_at	2.00832	0.0144544	Ptger3	prostaglandin E receptor 3 (subtype EP3)
1449025_at	-2.00795	0.0123747	Ifit3	interferon-induced protein with tetratricopeptide repeats 3
1430103_at	-2.00739	0.000725619	9030607L20Rik	RIKEN cDNA 9030607L20 gene
1424949_at	2.00708	0.00206793	Huwe1	HECT, UBA and WWE domain containing 1
1444845_at	-2.00702	0.0110637	Scfd1	Sec1 family domain containing 1
1416832_at	2.00645	0.0087635	Slc39a8	solute carrier family 39 (metal ion transporter), member 8
1438202_at	1.99943	0.00725037	Fam109b	family with sequence similarity 109, member B
1424131_at	1.99772	0.0246036	Col6a3	collagen, type VI, alpha 3
1435917_at	1.99345	0.0272412	Ociad2	OCIA domain containing 2
1421817_at	-1.99051	0.0314753	Gsr	glutathione reductase
1433781_a_at	1.98438	0.00155606	Cldn12	claudin 12
1435507_x_at	-1.98017	0.00200313	Prss2	protease, serine, 2
1454840_at	1.97867	0.00983346	Mccc2	methylcrotonoyl-Coenzyme A carboxylase 2 (beta)
1454790_at	1.97787	0.00511766	Wdr35	WD repeat domain 35
1424226_at	1.97496	0.00186069	9030617O03Rik	RIKEN cDNA 9030617O03 gene
1455099_at	-1.97433	0.0426609	Mogat2	monoacylglycerol O-acyltransferase 2
1433902_at	1.97409	0.000307201	Kbtbd8	kelch repeat and BTB (POZ) domain containing 8
1459469_at	-1.97327	0.000402129	C78516	expressed sequence C78516
1429703_at	-1.97081	0.0025865	2900072G11Rik	RIKEN cDNA 2900072G11 gene
1423915_at	-1.9705	0.0132916	Olfml2b	olfactomedin-like 2B
1456909_at	-1.96943	0.00436345	Gpi1	glucose phosphate isomerase 1
1437242_at	1.96889	0.000612443	Ttll12	tubulin tyrosine ligase-like family, member 12
1417995_at	-1.96859	0.0442871	Ptpn22	protein tyrosine phosphatase, non-receptor type 22 (lymphoid)
1423344_at	1.96522	0.00238695	Epor	erythropoietin receptor
1445546_at	1.96493	0.00710544	AI844685	expressed sequence AI844685
1428359_s_at	1.96461	0.0349836	Zg16	zymogen granule protein 16
1439050_at	1.96291	0.00137454	Gclm	glutamate-cysteine ligase, modifier subunit
1457508_at	-1.96257	0.02331	C430003N24Rik	RIKEN cDNA C430003N24 gene
1434920_a_at	-1.961	0.0174955	Evl	Ena-vasodilator stimulated phosphoprotein
1455322_at	1.96029	0.00264507	Ttc21b	tetratricopeptide repeat domain 21B
1430585_at	-1.95893	0.00645814	5930436O19Rik	RIKEN cDNA 5930436O19 gene
1424915_s_at	1.95653	0.00256277	2310044G17Rik	RIKEN cDNA 2310044G17 gene
1444467_at	-1.95651	0.0428517	C77534	expressed sequence C77534
1424634_at	1.95641	0.043616	Tceal1	transcription elongation factor A (SII)-like 1
1456634_at	1.95602	0.00458105	9830001H06Rik	RIKEN cDNA 9830001H06 gene
1456652_at	-1.95486	0.00511766	Dtl	denticleless homolog (Drosophila)
1428749_at	-1.95402	0.00680324	Dmxl2	Dmx-like 2
1425888_at	-1.95387	0.00262722	Klra17	killer cell lectin-like receptor, subfamily A, member 17
1437752_at	-1.95288	0.0238697	Lin28a	lin-28 homolog A (C. elegans)
1455256_at	1.94973	0.0057951	Tnik	TRAF2 and NCK interacting kinase
1460577_at	1.94854	0.00830849	Jmy	junction-mediating and regulatory protein
1427692_a_at	-1.94725	0.0307821	Cask	calcium/calmodulin-dependent serine protein kinase (MAGUK family)
1435605_at	1.9461	0.0317499	Actr3b	ARP3 actin-related protein 3 homolog B (yeast)
1420973_at	-1.94549	0.00148292	Arid5b	AT rich interactive domain 5B (MRF1-like)
1417235_at	1.94514	0.00550052	Ehd3	EH-domain containing 3
1433796_at	1.94417	0.00951431	Endod1	endonuclease domain containing 1
1453289_at	-1.94254	0.00561017	Eif2c4	eukaryotic translation initiation factor 2C, 4
1449491_at	-1.93696	0.0150033	Card10	caspase recruitment domain family, member 10
1437492_at	-1.9361	0.000996329	Mkx	mohawk homeobox
1438292_x_at	1.93544	0.000517965	Adk	adenosine kinase
1452291_at	-1.93288	0.00137479	Arap2	ArfGAP with RhoGAP domain, ankyrin repeat and PH domain 2
1449017_at	1.93186	0.000612443	Nutf2	nuclear transport factor 2
1452814_at	-1.92406	0.0284684	Cpne3	copine III
1451021_a_at	-1.92257	0.00694359	Klf5	Kruppel-like factor 5
1442445_at	-1.91938	0.00323287	2610027H17Rik	RIKEN cDNA 2610027H17 gene
1454617_at	-1.91708	0.000664466	Arrdc3	arrestin domain containing 3
1453562_a_at	1.91683	0.00960613	Nmral1	NmrA-like family domain containing 1
1427178_at	1.9154	0.00775827	Tmc4	transmembrane channel-like gene family 4
1434328_at	1.91378	0.00203393	Rpl15	ribosomal protein L15
1424011_at	1.91335	0.00187631	Aqp9	aquaporin 9
1455162_at	1.91193	0.00105835	Ttc39a	tetratricopeptide repeat domain 39A
1420170_at	-1.91098	0.00692899	Myh9	myosin, heavy polypeptide 9, non-muscle
1455398_at	1.9105	0.00941441	Lrrc8c	leucine rich repeat containing 8 family, member C
1449841_at	1.91001	0.00375561	Kif3a	kinesin family member 3A
1419387_s_at	1.90969	0.00238347	Muc13	mucin 13, epithelial transmembrane
1433596_at	1.90888	0.00469421	Dnajc6	DnaJ (Hsp40) homolog, subfamily C, member 6
1433732_x_at	-1.90843	0.019499	Igf2bp3	insulin-like growth factor 2 mRNA binding protein 3
1419603_at	-1.90402	0.045125	Ifi204	interferon activated gene 204
1418003_at	-1.90385	0.00593055	1190002H23Rik	RIKEN cDNA 1190002H23 gene
1438957_x_at	1.90022	0.00137454	Cds2	CDP-diacylglycerol synthase (phosphatidate cytidylyltransferase) 2
1444972_at	-1.89961	0.00504135	C77626	expressed sequence C77626
1450016_at	1.89929	0.00874683	Ccng1	cyclin G1
1449530_at	-1.89893	0.0336662	Trps1	trichorhinophalangeal syndrome I (human)
1458869_at	-1.8984	0.0140862	2900076A13Rik	RIKEN cDNA 2900076A13 gene
1435985_at	1.89381	0.00643429	Farp2	FERM, RhoGEF and pleckstrin domain protein 2
1452823_at	1.89309	0.00323287	Gstk1	glutathione S-transferase kappa 1
1448896_at	1.89195	0.0110745	Pigf	phosphatidylinositol glycan anchor biosynthesis, class F
1455886_at	-1.88903	0.0218369	Cbl	Casitas B-lineage lymphoma
1420930_s_at	1.88792	0.000979014	Ctnnal1	catenin (cadherin associated protein), alpha-like 1
1423590_at	-1.88577	0.0444397	Napsa	napsin A aspartic peptidase
1425553_s_at	-1.8831	0.00410932	Hip1r	huntingtin interacting protein 1 related
1429599_a_at	1.88258	0.00720305	Mthfd2l	methylenetetrahydrofolate dehydrogenase (NADP+ dependent) 2-like
1418796_at	1.88187	0.00228942	Clec11a	C-type lectin domain family 11, member a
1441799_at	-1.87992	0.0133326	6030422H21Rik	RIKEN cDNA 6030422H21 gene
1424191_a_at	1.87815	0.00837087	Tmem41a	transmembrane protein 41a
1453627_at	-1.87642	0.0420676	2610020P09Rik	RIKEN cDNA 2610020P09 gene
1427040_at	-1.87561	0.00632485	Mdfic	MyoD family inhibitor domain containing
1417841_at	1.87391	0.00264922	Pxmp2	peroxisomal membrane protein 2
1457901_at	-1.87252	0.00879359	D4Ertd76e	DNA segment, Chr 4, ERATO Doi 76, expressed
1451352_s_at	1.87128	0.00658921	Mta3	metastasis associated 3
1452606_at	1.87064	0.0041395	Mnd1	meiotic nuclear divisions 1 homolog (S. cerevisiae)
1429960_at	-1.86923	0.0421342	4930438A08Rik	RIKEN cDNA 4930438A08 gene
1459589_at	-1.86662	0.00621947	Cryl1	crystallin, lambda 1
1425137_a_at	-1.8656	0.0198397	H2-Q10	histocompatibility 2, Q region locus 10
1457304_at	-1.86553	0.00610156	D13Ertd787e	DNA segment, Chr 13, ERATO Doi 787, expressed
1428585_at	-1.86456	0.0362137	Actn1	actinin, alpha 1
1448926_at	1.86361	0.00866953	Hoxa5	homeobox A5
1428221_at	1.86342	0.0415194	Klhdc8b	kelch domain containing 8B
1442295_at	-1.86165	0.00177721	Arpc2	actin related protein 2/3 complex, subunit 2
1433757_a_at	-1.85991	0.00607009	Nisch	nischarin
1451259_at	1.85919	0.00736593	Rexo2	REX2, RNA exonuclease 2 homolog (S. cerevisiae)
1440417_at	-1.85908	0.00215513	D19Ertd409e	DNA segment, Chr 19, ERATO Doi 409, expressed
1423627_at	1.85782	0.000664466	Nqo1	NAD(P)H dehydrogenase, quinone 1
1457264_at	-1.85769	0.0156945	Phf20l1	PHD finger protein 20-like 1
1431980_a_at	-1.85563	0.0354594	As3mt	arsenic (+3 oxidation state) methyltransferase
1418909_at	1.85386	0.00175824	Ermap	erythroblast membrane-associated protein
1449980_a_at	-1.85195	0.000612443	Gabrd	gamma-aminobutyric acid (GABA) A receptor, subunit delta
1424110_a_at	1.85138	0.00955853	Nme1	non-metastatic cells 1, protein (NM23A) expressed in
1452830_s_at	1.85054	0.0225995	Cad	carbamoyl-phosphate synthetase 2, aspartate transcarbamylase, and dihydroorotase
1434497_at	1.85036	0.0466587	4933431E20Rik	RIKEN cDNA 4933431E20 gene
1427982_s_at	-1.85015	0.000621733	Syne2	synaptic nuclear envelope 2
1422053_at	-1.8498	0.0157539	Inhba	inhibin beta-A
1416871_at	-1.84835	0.018628	Adam8	a disintegrin and metallopeptidase domain 8
1416052_at	1.84721	0.00187631	Prps1	phosphoribosyl pyrophosphate synthetase 1
1460255_at	-1.84643	0.00543827	Tnfsf13b	tumor necrosis factor (ligand) superfamily, member 13b
1424694_at	1.84598	0.00692938	2010011I20Rik	RIKEN cDNA 2010011I20 gene
1425350_a_at	1.84549	0.00415099	Myef2	myelin basic protein expression factor 2, repressor
1448918_at	-1.8446	0.00994354	Slco3a1	solute carrier organic anion transporter family, member 3a1
1417588_at	-1.84399	0.00139052	Galnt3	UDP-N-acetyl-alpha-D-galactosamine:polypeptide N-acetylgalactosaminyltransferase 3
1434606_at	1.84246	0.00322632	Erbb3	v-erb-b2 erythroblastic leukemia viral oncogene homolog 3 (avian)
1418191_at	-1.84228	0.0308342	Usp18	ubiquitin specific peptidase 18
1436074_at	-1.84225	0.000895327	Nfkbid	nuclear factor of kappa light polypeptide gene enhancer in B cells inhibitor, delta
1436212_at	-1.83745	0.0144544	Tmem71	transmembrane protein 71
1429088_at	-1.83734	0.0067297	Lbh	limb-bud and heart
1448499_a_at	1.83672	0.0409715	Ephx2	epoxide hydrolase 2, cytoplasmic
1436420_a_at	1.83493	0.0091927	Ipo4	importin 4
1426258_at	-1.83485	0.0407528	Sorl1	sortilin-related receptor, LDLR class A repeats-containing
1430353_at	-1.83396	0.0201214	Glis3	GLIS family zinc finger 3
1417889_at	1.83239	0.00699676	Apobec2	apolipoprotein B mRNA editing enzyme, catalytic polypeptide 2
1429261_at	1.83194	0.000924509	2210411K11Rik	RIKEN cDNA 2210411K11 gene
1428288_at	1.83185	0.0117244	Klf9	Kruppel-like factor 9
1449989_at	1.83144	0.0119866	Mcpt2	mast cell protease 2
1428562_at	-1.82805	0.00238695	2210403K04Rik	RIKEN cDNA 2210403K04 gene
1430802_at	-1.82668	0.00099404	H2-Q8	histocompatibility 2, Q region locus 8
1451458_at	-1.82423	0.00366351	Tmem2	transmembrane protein 2
1439101_at	1.82317	0.00313284	Mylk3	myosin light chain kinase 3
1428910_at	1.82105	0.00175883	2310022B05Rik	RIKEN cDNA 2310022B05 gene
1426015_s_at	1.81967	0.000777198	Asph	aspartate-beta-hydroxylase
1424081_at	1.81896	0.000664466	Pcgf6	polycomb group ring finger 6
1440736_at	-1.81785	0.0025865	AI131651	expressed sequence AI131651
1448535_at	1.81728	0.000664466	Elp4	elongation protein 4 homolog (S. cerevisiae)
1417254_at	1.81616	0.00788087	Spata5	spermatogenesis associated 5
1452665_at	1.81312	0.00975924	Ttc27	tetratricopeptide repeat domain 27
1430391_a_at	-1.81265	0.006473	St8sia4	ST8 alpha-N-acetyl-neuraminide alpha-2,8-sialyltransferase 4
1419289_a_at	1.81159	0.00204522	Syngr1	synaptogyrin 1
1451248_at	1.81032	0.0189362	Prmt7	protein arginine N-methyltransferase 7
1452879_at	1.81005	0.00436345	Synpo2	synaptopodin 2
1452521_a_at	-1.80994	0.01888	Plaur	plasminogen activator, urokinase receptor
1450897_at	1.80991	0.0318661	Arhgap5	Rho GTPase activating protein 5
1427476_a_at	1.80968	0.000612443	Trim32	tripartite motif-containing 32
1449049_at	-1.80961	0.00752221	Tlr1	toll-like receptor 1
1456509_at	-1.8086	0.00605171	1110032F04Rik	RIKEN cDNA 1110032F04 gene
1434689_at	1.80698	0.0121205	Zfp637	zinc finger protein 637
1439550_at	-1.80107	0.00105449	Tnrc18	trinucleotide repeat containing 18
1421733_a_at	1.80092	0.00652066	Tpst1	protein-tyrosine sulfotransferase 1
1426546_at	-1.79896	0.00664887	Tesk2	testis-specific kinase 2
1418920_at	-1.79869	0.0339625	Cldn15	claudin 15
1442251_at	-1.79679	0.0185121	Vcpip1	valosin containing protein (p97)/p47 complex interacting protein 1
1448626_at	1.79642	0.00229062	Cdk5rap1	CDK5 regulatory subunit associated protein 1
1455902_x_at	1.79584	0.00812067	Rhof	ras homolog gene family, member f
1426599_a_at	1.79505	0.0011899	Slc2a1	solute carrier family 2 (facilitated glucose transporter), member 1
1420901_a_at	1.79462	0.00754414	Hk1	hexokinase 1
1453255_at	1.79459	0.0496903	Slc43a1	solute carrier family 43, member 1
1424394_at	1.79449	0.0131371	Selm	selenoprotein M
1443969_at	1.79415	0.00339405	Irs2	insulin receptor substrate 2
1428024_at	-1.78969	0.00107661	Map1lc3b	microtubule-associated protein 1 light chain 3 beta
1452716_at	1.78794	0.0458253	5730469M10Rik	RIKEN cDNA 5730469M10 gene
1451240_a_at	1.78714	0.0011899	Glo1	glyoxalase 1
1428799_at	1.78698	0.000653626	Lca5	Leber congenital amaurosis 5 (human)
1433946_at	1.78662	0.00426728	Zik1	zinc finger protein interacting with K protein 1
1430357_at	-1.78653	0.00883954	H3f3b	H3 histone, family 3B
1425993_a_at	1.78559	0.0382894	Hsph1	heat shock 105kDa/110kDa protein 1
1431771_a_at	1.78484	0.000793711	Irak1bp1	interleukin-1 receptor-associated kinase 1 binding protein 1
1448619_at	1.78377	0.00728286	Dhcr7	7-dehydrocholesterol reductase
1444163_at	1.78348	0.0454029	Nek5	NIMA (never in mitosis gene a)-related expressed kinase 5
1427944_at	1.78334	0.00301044	Caprin2	caprin family member 2
1439673_at	-1.78291	0.00386821	E230008O15Rik	RIKEN cDNA E230008O15 gene
1452035_at	1.77938	0.0326053	Col4a1	collagen, type IV, alpha 1
1436591_at	1.77912	0.018798	Vsig10	V-set and immunoglobulin domain containing 10
1436704_x_at	1.77551	0.00489904	Mthfd1	methylenetetrahydrofolate dehydrogenase (NADP+ dependent), methenyltetrahydrofolate cyclohydrolase, formyltetrahydrofolate synthase
1450062_a_at	1.77532	0.00085645	Maged1	melanoma antigen, family D, 1
1451659_at	-1.77511	0.00682661	Fgd4	FYVE, RhoGEF and PH domain containing 4
1449174_at	1.77451	0.00837087	Art4	ADP-ribosyltransferase 4
1423854_a_at	-1.77401	0.0053527	Rasl11b	RAS-like, family 11, member B
1417208_at	1.77394	0.0141958	Amacr	alpha-methylacyl-CoA racemase
1451139_at	1.7736	0.0351169	Slc39a4	solute carrier family 39 (zinc transporter), member 4
1433789_at	1.77141	0.0111948	Snhg3	small nucleolar RNA host gene (non-protein coding) 3
1449993_at	1.7699	0.00370404	Vamp5	vesicle-associated membrane protein 5
1434856_at	-1.76824	0.0345541	Ankrd44	ankyrin repeat domain 44
1452257_at	1.76511	0.00706866	Bdh1	3-hydroxybutyrate dehydrogenase, type 1
1418962_at	1.76294	0.00668188	Necap2	NECAP endocytosis associated 2
1415993_at	1.76264	0.00710586	Sqle	squalene epoxidase
1415995_at	1.76223	0.00711749	Casp6	caspase 6
1426513_at	1.76148	0.00290328	Rbm28	RNA binding motif protein 28
1416503_at	1.76056	0.0116058	Lxn	latexin
1436724_a_at	1.75961	0.00574876	Eif2d	eukaryotic translation initiation factor 2D
1417622_at	1.75937	0.00186069	Slc12a2	solute carrier family 12, member 2
1416000_a_at	1.75168	0.00725037	Prdx1	peroxiredoxin 1
1433699_at	-1.75078	0.0382258	Tnfaip3	tumor necrosis factor, alpha-induced protein 3
1417575_at	1.74943	0.00171951	Otub2	OTU domain, ubiquitin aldehyde binding 2
1417168_a_at	-1.74794	0.00489122	Usp2	ubiquitin specific peptidase 2
1449052_a_at	1.74748	0.00189909	Dnmt3b	DNA methyltransferase 3B
1442643_at	-1.74689	0.000950706	Kdm6b	KDM1 lysine (K)-specific demethylase 6B
1438701_at	1.74667	0.00258532	Bicd1	bicaudal D homolog 1 (Drosophila)
1441218_at	-1.74495	0.0144883	Ttc21a	tetratricopeptide repeat domain 21A
1421852_at	1.74478	0.000899455	Kcnk5	potassium channel, subfamily K, member 5
1458318_at	-1.74476	0.0246539	3110047M12Rik	RIKEN cDNA 3110047M12 gene
1460065_at	-1.74462	0.00426728	AA763515	expressed sequence AA763515
1438711_at	1.74428	0.0189362	Pklr	pyruvate kinase liver and red blood cell
1425895_a_at	-1.74427	0.0396586	Id1	inhibitor of DNA binding 1
1417811_at	-1.74312	0.0140226	Slc24a6	solute carrier family 24 (sodium/potassium/calcium exchanger), member 6
1440085_at	1.74204	0.0278382	Eda2r	ectodysplasin A2 receptor
1435463_s_at	1.74071	0.00951431	Myo1d	myosin ID
1455372_at	1.73707	0.0208103	Cpeb3	cytoplasmic polyadenylation element binding protein 3
1417293_at	1.73684	0.0113036	Hs6st1	heparan sulfate 6-O-sulfotransferase 1
1426782_at	1.73643	0.00952968	Gpr125	G protein-coupled receptor 125
1426706_s_at	1.73472	0.00247752	Xylb	xylulokinase homolog (H. influenzae)
1452836_at	1.73427	0.00351963	Lpin2	lipin 2
1454918_at	-1.73359	0.0203516	Agps	alkylglycerone phosphate synthase
1451278_a_at	1.73259	0.00573631	Mettl11a	methyltransferase like 11A
1418318_at	1.7318	0.0212024	Rnf128	ring finger protein 128
1436124_at	1.73049	0.00528012	Pcyt1b	phosphate cytidylyltransferase 1, choline, beta isoform
1451277_at	1.72868	0.00681351	Zadh2	zinc binding alcohol dehydrogenase, domain containing 2
1421182_at	-1.72684	0.0204018	Clec1b	C-type lectin domain family 1, member b
1452272_a_at	1.72627	0.0172279	Gfer	growth factor, erv1 (S. cerevisiae)-like (augmenter of liver regeneration)
1416595_at	1.72525	0.00436345	Mrps22	mitochondrial ribosomal protein S22
1417074_at	-1.72476	0.0240232	Ceacam10	carcinoembryonic antigen-related cell adhesion molecule 10
1437775_at	-1.72422	0.000816089	Dlst	dihydrolipoamide S-succinyltransferase (E2 component of 2-oxo-glutarate complex)
1442878_at	-1.72291	0.00243564	Prdx6	peroxiredoxin 6
1425476_at	-1.72181	0.0164275	Col4a5	collagen, type IV, alpha 5
1420919_at	-1.72153	0.00724682	Sgk3	serum/glucocorticoid regulated kinase 3
1456544_at	-1.72097	0.0304785	Tmem38b	transmembrane protein 38B
1431946_a_at	1.71997	0.0483153	Necab3	N-terminal EF-hand calcium binding protein 3
1420965_a_at	1.71978	0.00887456	Enc1	ectodermal-neural cortex 1
1428164_at	1.71911	0.00489122	Nudt9	nudix (nucleoside diphosphate linked moiety X)-type motif 9
1423482_at	1.71807	0.00497901	Uros	uroporphyrinogen III synthase
1419450_at	1.71713	0.00923194	Ormdl3	ORM1-like 3 (S. cerevisiae)
1426243_at	1.71366	0.00125682	Cth	cystathionase (cystathionine gamma-lyase)
1450935_at	1.71332	0.00744454	Ercc5	excision repair cross-complementing rodent repair deficiency, complementation group 5
1444041_at	-1.71278	0.00321462	AU041133	expressed sequence AU041133
1417879_at	1.71198	0.0272412	Nenf	neuron derived neurotrophic factor
1418401_a_at	1.71126	0.0045564	Dusp16	dual specificity phosphatase 16
1428853_at	1.71017	0.0103103	Ptch1	patched homolog 1
1432164_a_at	1.70734	0.0128452	Gcsh	glycine cleavage system protein H (aminomethyl carrier)
1426496_at	1.70628	0.0087728	Wdr55	WD repeat domain 55
1433970_at	1.70577	0.0139966	Bola3	bolA-like 3 (E. coli)
1436240_at	-1.70487	0.00138118	B230214O09Rik	RIKEN cDNA B230214O09 gene
1438495_at	-1.70472	0.00192326	Top1	topoisomerase (DNA) I
1436481_at	1.70123	0.0238697	Atp7b	ATPase, Cu++ transporting, beta polypeptide
1441836_x_at	1.70057	0.00658921	Gtsf1	gametocyte specific factor 1
1423878_at	1.70005	0.00790851	Gypc	glycophorin C
1420159_at	1.69996	0.0265291	Myo1e	myosin IE
1434725_at	1.69982	0.00670437	Gramd1c	GRAM domain containing 1C
1445746_at	-1.69917	0.0366109	Eif4h	eukaryotic translation initiation factor 4H
1451370_at	1.69811	0.00941441	Ccdc107	coiled-coil domain containing 107
1441272_at	1.69622	0.00427096	Matr3	matrin 3
1420621_a_at	-1.69442	0.0473715	App	amyloid beta (A4) precursor protein
1455135_at	1.69396	0.00336787	Prr24	proline rich 24
1441631_at	-1.69051	0.00564418	Ddx24	DEAD (Asp-Glu-Ala-Asp) box polypeptide 24
1455787_x_at	1.6899	0.0152105	Minpp1	multiple inositol polyphosphate histidine phosphatase 1
1452182_at	1.6897	0.00137454	Galnt2	UDP-N-acetyl-alpha-D-galactosamine:polypeptide N-acetylgalactosaminyltransferase 2
1447870_x_at	1.6888	0.0123304	1110002E22Rik	RIKEN cDNA 1110002E22 gene
1437687_x_at	1.68613	0.0426379	Fkbp9	FK506 binding protein 9
1427282_a_at	1.68418	0.00828003	Fxn	frataxin
1450735_at	1.68287	0.00780698	Pno1	partner of NOB1 homolog (S. cerevisiae)
1437377_a_at	1.68278	0.0202921	Polrmt	polymerase (RNA) mitochondrial (DNA directed)
1453261_at	-1.68232	0.00107661	2610035D17Rik	RIKEN cDNA 2610035D17 gene
1430404_at	-1.68104	0.00512582	LOC75771	uncharacterized LOC75771
1417177_at	1.68081	0.0144511	Galk1	galactokinase 1
1448230_at	1.68056	0.00234352	Usp10	ubiquitin specific peptidase 10
1426248_at	1.68011	0.00125682	Stk24	serine/threonine kinase 24 (STE20 homolog, yeast)
1455936_a_at	1.67791	0.0232136	Rbpms	RNA binding protein gene with multiple splicing
1419463_at	1.67778	0.0063487	Clca2	chloride channel calcium activated 2
1423812_s_at	1.67715	0.0120285	Vopp1	vesicular, overexpressed in cancer, prosurvival protein 1
1442320_at	-1.67687	0.00696109	LOC553096	uncharacterized LOC553096
1453429_at	1.67506	0.00457875	9530057J20Rik	RIKEN cDNA 9530057J20 gene
1424596_s_at	1.67381	0.000950706	Lmcd1	LIM and cysteine-rich domains 1
1423357_at	1.67321	0.0130622	Lipt2	lipoyl(octanoyl) transferase 2 (putative)
1422524_at	1.67271	0.0168514	Abcb6	ATP-binding cassette, sub-family B (MDR/TAP), member 6
1436193_at	-1.67242	0.0257267	Man1c1	mannosidase, alpha, class 1C, member 1
1417594_at	1.67206	0.00124853	Gkap1	G kinase anchoring protein 1
1432686_at	-1.67109	0.00643429	4833406M21Rik	RIKEN cDNA 4833406M21 gene
1445938_at	1.669	0.00573631	5930427L02Rik	RIKEN cDNA 5930427L02 gene
1419175_a_at	1.66884	0.00189909	Btn1a1	butyrophilin, subfamily 1, member A1
1435452_at	1.66758	0.00209222	Tmem20	transmembrane protein 20
1448301_s_at	-1.66572	0.0320789	Serpinb1a	serine (or cysteine) peptidase inhibitor, clade B, member 1a
1416211_a_at	1.66406	0.000570744	Ptn	pleiotrophin
1447526_at	-1.66319	0.00489122	D5Ertd255e	DNA segment, Chr 5, ERATO Doi 255, expressed
1458524_at	-1.66204	0.000816089	Fndc3a	fibronectin type III domain containing 3A
1420903_at	1.6605	0.0137875	St6galnac3	ST6 (alpha-N-acetyl-neuraminyl-2,3-beta-galactosyl-1,3)-N-acetylgalactosaminide alpha-2,6-sialyltransferase 3
1430135_at	1.65963	0.00707689	Dnase2a	deoxyribonuclease II alpha
1422562_at	1.65923	0.00336787	Rrad	Ras-related associated with diabetes
1440721_at	-1.65833	0.0340814	5930433N17Rik	RIKEN cDNA 5930433N17 gene
1438856_x_at	1.65796	0.00793016	Serpinb5	serine (or cysteine) peptidase inhibitor, clade B, member 5
1436932_at	1.65781	0.000733601	Grhl3	grainyhead-like 3 (Drosophila)
1430297_a_at	1.6562	0.00741449	Aplf	aprataxin and PNKP like factor
1459835_s_at	-1.65605	0.016083	Dnaja1	DnaJ (Hsp40) homolog, subfamily A, member 1
1438349_at	1.6553	0.0113381	Zfp229	zinc finger protein
1422024_at	-1.65515	0.00885367	Fli1	Friend leukemia integration 1
1452172_at	1.65471	0.0393221	Fastkd2	FAST kinase domains 2
1416136_at	-1.65441	0.0383972	Mmp2	matrix metallopeptidase 2
1416742_at	1.65421	0.00164493	Cfdp1	craniofacial development protein 1
1430089_at	-1.65419	0.00105835	5830469G19Rik	RIKEN cDNA 5830469G19 gene
1455897_x_at	1.65322	0.00680324	Hmgn1	high mobility group nucleosomal binding domain 1
1416665_at	1.65077	0.00490288	Coq7	demethyl-Q 7
1433694_at	-1.65064	0.00983346	Pde3b	phosphodiesterase 3B, cGMP-inhibited
1450087_a_at	1.64986	0.00648349	Nolc1	nucleolar and coiled-body phosphoprotein 1
1448700_at	-1.6493	0.0447643	G0s2	G0/G1 switch gene 2
1449065_at	-1.64839	0.0316113	Acot1	acyl-CoA thioesterase 1
1426099_at	-1.6479	0.0089459	Hrh4	histamine receptor H4
1439284_at	1.64777	0.0295749	Epb4.1l5	erythrocyte protein band 4.1-like 5
1418942_at	1.64718	0.00521814	Ift74	intraflagellar transport 74 homolog (Chlamydomonas)
1434958_at	1.6463	0.00834893	Sacs	sacsin
1453065_at	1.64548	0.00458105	Aldh5a1	aldhehyde dehydrogenase family 5, subfamily A1
1442640_at	-1.64447	0.0203291	Slfn5	schlafen 5
1452106_at	1.64407	0.00593151	Npnt	nephronectin
1457459_at	-1.64352	0.00537898	AU014973	expressed sequence AU014973
1448740_at	1.64344	0.00794377	Rangrf	RAN guanine nucleotide release factor
1430128_a_at	1.64288	0.0120406	Reep6	receptor accessory protein 6
1416268_at	-1.64258	0.00346508	Ets2	E26 avian leukemia oncogene 2, 3' domain
1443923_at	-1.64132	0.0116295	Akap13	A kinase (PRKA) anchor protein 13
1428551_at	1.63911	0.0011899	Trmt11	tRNA methyltransferase 11 homolog (S. cerevisiae)
1450350_a_at	-1.63853	0.0390494	Jdp2	Jun dimerization protein 2
1416996_at	-1.63555	0.0299097	Tbc1d8	TBC1 domain family, member 8
1418226_at	1.63517	0.00368166	Orc2	origin recognition complex, subunit 2
1422440_at	1.63502	0.0165314	Cdk4	cyclin-dependent kinase 4
1436181_at	1.63418	0.005445	Asap2	ArfGAP with SH3 domain, ankyrin repeat and PH domain 2
1450214_at	-1.63251	0.0124624	Adora2b	adenosine A2b receptor
1457701_at	1.62951	0.00426728	Tmem136	transmembrane protein 136
1430781_at	1.62854	0.00504135	Ak7	adenylate kinase 7
1432057_a_at	1.62632	0.00916973	Prdm5	PR domain containing 5
1420444_at	1.62545	0.0134121	Slc22a3	solute carrier family 22 (organic cation transporter), member 3
1428477_at	1.62541	0.00149457	Elac2	elaC homolog 2 (E. coli)
1438610_a_at	1.62274	0.00232414	Cryz	crystallin, zeta
1435189_at	1.62164	0.00484432	Frmpd1	FERM and PDZ domain containing 1
1428579_at	1.62127	0.0182896	Fmnl2	formin-like 2
1441945_s_at	1.62105	0.00958348	Abhd14a	abhydrolase domain containing 14A
1419208_at	-1.62053	0.042221	Map3k8	mitogen-activated protein kinase kinase kinase 8
1449044_at	1.62052	0.00653873	Eef1e1	eukaryotic translation elongation factor 1 epsilon 1
1445539_at	-1.61989	0.00186069	Pde7b	phosphodiesterase 7B
1425934_a_at	1.61843	0.013604	B4galt4	UDP-Gal:betaGlcNAc beta 1,4-galactosyltransferase, polypeptide 4
1423456_at	1.61623	0.00412884	Bzw2	basic leucine zipper and W2 domains 2
1459054_at	-1.61523	0.00864592	Casz1	castor homolog 1, zinc finger (Drosophila)
1441477_at	-1.61278	0.00158005	Calu	calumenin
1451866_a_at	-1.61235	0.00161673	Hgf	hepatocyte growth factor
1433626_at	1.61219	0.00439154	Plscr4	phospholipid scramblase 4
1429254_at	1.61144	0.00158005	Aqp11	aquaporin 11
1418267_at	1.6103	0.00794377	Mst1	macrophage stimulating 1 (hepatocyte growth factor-like)
1443904_at	-1.60915	0.0169747	Fads6	fatty acid desaturase domain family, member 6
1423885_at	1.60728	0.006473	Lamc1	laminin, gamma 1
1418517_at	1.6069	0.0151638	Irx3	Iroquois related homeobox 3 (Drosophila)
1427892_at	-1.60616	0.0383224	Myo1g	myosin IG
1460719_a_at	-1.60418	0.0124236	P2rx1	purinergic receptor P2X, ligand-gated ion channel, 1
1451567_a_at	-1.60364	0.021407	Ifi203	interferon activated gene 203
1420752_at	1.60196	0.0036145	Dtx3	deltex 3 homolog (Drosophila)
1444758_at	-1.60137	0.00960613	4930595D18Rik	RIKEN cDNA 4930595D18 gene
1454418_at	-1.60084	0.00676336	5330421C15Rik	RIKEN cDNA 5330421C15 gene
1417513_at	-1.6004	0.00157729	Evi5	ecotropic viral integration site 5
1428096_at	1.59996	0.00506026	Ipo11	importin 11
1441411_at	-1.59969	0.00741449	Lims1	LIM and senescent cell antigen-like domains 1
1435665_at	-1.59873	0.000701675	Trim30d	tripartite motif-containing 30D
1438109_at	1.59824	0.0260752	Clca5	chloride channel calcium activated 5
1455970_at	1.59773	0.00319499	Pde5a	phosphodiesterase 5A, cGMP-specific
1423877_at	1.59669	0.00489122	Chaf1b	chromatin assembly factor 1, subunit B (p60)
1416619_at	-1.59574	0.0487649	4632428N05Rik	RIKEN cDNA 4632428N05 gene
1447961_s_at	1.59547	0.00240379	Mrpl38	mitochondrial ribosomal protein L38
1440671_at	-1.59527	0.0039297	A130012E19Rik	RIKEN cDNA A130012E19 gene
1419030_at	-1.59493	0.00425491	Ero1l	ERO1-like (S. cerevisiae)
1439859_at	-1.59488	0.00316193	9630033F20Rik	RIKEN cDNA 9630033F20 gene
1456547_at	-1.59478	0.00370404	Gm19313	predicted gene, 19313
1444886_at	-1.5945	0.00186069	Appbp2	amyloid beta precursor protein (cytoplasmic tail) binding protein 2
1450162_at	1.5931	0.00567909	Dpf3	D4, zinc and double PHD fingers, family 3
1434422_at	1.59293	0.00372149	1700066M21Rik	RIKEN cDNA 1700066M21 gene
1416831_at	-1.59196	0.00668963	Neu1	neuraminidase 1
1431131_s_at	1.59128	0.00190686	A630007B06Rik	RIKEN cDNA A630007B06 gene
1454957_at	1.59088	0.00262722	Nob1	NIN1/RPN12 binding protein 1 homolog (S. cerevisiae)
1424410_at	1.59066	0.00953692	Ttc8	tetratricopeptide repeat domain 8
1453137_at	-1.59044	0.00516407	Fbxo30	F-box protein 30
1449933_a_at	1.58923	0.00953692	Tsen15	tRNA splicing endonuclease 15 homolog (S. cerevisiae)
1428684_at	1.5864	0.0139765	1500001M20Rik	RIKEN cDNA 1500001M20 gene
1427020_at	1.58609	0.0445516	Scara3	scavenger receptor class A, member 3
1434240_at	1.58526	0.0107948	4632434I11Rik	RIKEN cDNA 4632434I11 gene
1458737_at	1.58521	0.0173192	C77097	expressed sequence C77097
1450914_at	1.58374	0.0226166	Ppp1r14b	protein phosphatase 1, regulatory (inhibitor) subunit 14B
1423213_at	1.58238	0.0146226	Plxnc1	plexin C1
1426825_at	-1.58152	0.0119568	Fmnl3	formin-like 3
1417212_at	1.58144	0.014655	Fam195a	family with sequence similarity 195, member A
1446861_at	-1.58023	0.000791647	Gns	glucosamine (N-acetyl)-6-sulfatase
1437551_at	-1.57989	0.00428987	Fam63a	family with sequence similarity 63, member A
1430458_at	-1.57987	0.00247009	Supt6h	suppressor of Ty 6 homolog (S. cerevisiae)
1430023_at	1.57877	0.00246422	Spata24	spermatogenesis associated 24
1421620_at	-1.57838	0.00138338	Il5ra	interleukin 5 receptor, alpha
1434401_at	-1.57724	0.00831061	Zcchc2	zinc finger, CCHC domain containing 2
1439422_a_at	1.57722	0.0155632	Fam132a	family with sequence similarity 132, member A
1449434_at	1.57666	0.0154025	Car3	carbonic anhydrase 3
1423450_a_at	-1.57311	0.000892058	Hs3st1	heparan sulfate (glucosamine) 3-O-sulfotransferase 1
1424663_at	-1.57177	0.00212218	BC017647	cDNA sequence BC017647
1424716_at	1.56987	0.00339405	Retsat	retinol saturase (all trans retinol 13,14 reductase)
1455200_at	1.56897	0.00136396	Pak6	p21 protein (Cdc42/Rac)-activated kinase 6
1455580_at	1.56865	0.00564418	Usp6nl	USP6 N-terminal like
1417901_a_at	1.56851	0.0209869	Ica1	islet cell autoantigen 1
1460397_at	1.56761	0.0132923	Armc6	armadillo repeat containing 6
1420907_at	1.56727	0.0222629	Cd2ap	CD2-associated protein
1444102_at	-1.56718	0.018514	Gm13012	predicted gene 13012
1454842_a_at	1.5669	0.00209222	B3galnt2	UDP-GalNAc:betaGlcNAc beta 1,3-galactosaminyltransferase, polypeptide 2
1454931_at	1.56677	0.0336609	Eid2	EP300 interacting inhibitor of differentiation 2
1434736_at	1.56535	0.00160195	Hlf	hepatic leukemia factor
1456917_at	-1.56509	0.00146878	Arfgef1	ADP-ribosylation factor guanine nucleotide-exchange factor 1(brefeldin A-inhibited)
1428553_at	1.56468	0.014102	Glrx5	glutaredoxin 5 homolog (S. cerevisiae)
1423739_x_at	1.56366	0.00458105	Aplp2	amyloid beta (A4) precursor-like protein 2
1417972_s_at	1.56327	0.0408854	Pop5	processing of precursor 5, ribonuclease P/MRP family (S. cerevisiae)
1455841_s_at	1.56319	0.0273726	Grwd1	glutamate-rich WD repeat containing 1
1421288_at	1.56308	0.0037868	F2rl3	coagulation factor II (thrombin) receptor-like 3
1423176_at	-1.56261	0.0197666	Tob1	transducer of ErbB-2.1
1417331_a_at	1.56221	0.00270034	Arl6	ADP-ribosylation factor-like 6
1450240_a_at	-1.56099	0.00136261	Sytl1	synaptotagmin-like 1
1456901_at	1.56099	0.0261487	Adamts20	a disintegrin-like and metallopeptidase (reprolysin type) with thrombospondin type 1 motif, 20
1448699_at	1.56094	0.00737006	Mrpl54	mitochondrial ribosomal protein L54
1418257_at	1.56081	0.0047435	Slc12a7	solute carrier family 12, member 7
1448026_at	-1.56063	0.0225202	Chd7	chromodomain helicase DNA binding protein 7
1426686_s_at	-1.56048	0.0261645	Map3k3	mitogen-activated protein kinase kinase kinase 3
1458308_at	-1.55993	0.00187631	Sbno2	strawberry notch homolog 2 (Drosophila)
1416896_at	-1.55816	0.00668065	Rps6ka1	ribosomal protein S6 kinase polypeptide 1
1419031_at	1.55639	0.00426728	Fads2	fatty acid desaturase 2
1448713_at	-1.55312	0.00426728	Stat4	signal transducer and activator of transcription 4
1421014_a_at	1.55224	0.00536953	Clybl	citrate lyase beta like
1452319_at	1.55212	0.0114191	Zfp82	zinc finger protein 82
1435363_at	-1.55206	0.0122702	Plekhg1	pleckstrin homology domain containing, family G (with RhoGef domain) member 1
1447625_at	-1.55179	0.00606996	E2f5	E2F transcription factor 5
1419754_at	-1.55127	0.0437593	Myo5a	myosin VA
1452771_s_at	1.54992	0.00511753	Acsl3	acyl-CoA synthetase long-chain family member 3
1452585_at	1.54692	0.0485914	Mrps28	mitochondrial ribosomal protein S28
1433855_at	1.54654	0.00411556	Abat	4-aminobutyrate aminotransferase
1451649_a_at	1.54634	0.00374135	Wdr75	WD repeat domain 75
1455643_s_at	1.54631	0.00459152	Tsr1	TSR1, 20S rRNA accumulation, homolog (yeast)
1454841_at	1.5453	0.00983346	Urb1	URB1 ribosome biogenesis 1 homolog (S. cerevisiae)
1455757_at	1.5449	0.0215923	D3Ertd254e	DNA segment, Chr 3, ERATO Doi 254, expressed
1448327_at	1.54464	0.0021884	Actn2	actinin alpha 2
1433634_at	-1.54343	0.00489122	Irf2bp2	interferon regulatory factor 2 binding protein 2
1434857_at	-1.54311	0.0253352	Zfp783	zinc finger protein 783
1457537_at	-1.54287	0.00372149	Rab1	RAB1, member RAS oncogene family
1427927_at	1.5425	0.00725037	Hscb	HscB iron-sulfur cluster co-chaperone homolog (E. coli)
1417673_at	-1.54247	0.0193323	Grb14	growth factor receptor bound protein 14
1428797_at	1.54225	0.0094189	Setd6	SET domain containing 6
1428557_a_at	1.54155	0.00707689	Osgepl1	O-sialoglycoprotein endopeptidase-like 1
1421217_a_at	1.53936	0.00469421	Lgals9	lectin, galactose binding, soluble 9
1456481_at	1.5393	0.00643429	Esyt3	extended synaptotagmin-like protein 3
1449765_at	-1.5391	0.00996166	C76628	expressed sequence C76628
1432669_at	-1.53836	0.00926852	9030420N05Rik	RIKEN cDNA 9030420N05 gene
1424268_at	1.53813	0.00434119	Smox	spermine oxidase
1451970_at	-1.53737	0.0263204	Daglb	diacylglycerol lipase, beta
1417005_at	1.53671	0.00146878	Klc1	kinesin light chain 1
1455434_a_at	1.5354	0.00994084	Ktn1	kinectin 1
1420851_at	1.53527	0.0177507	Pard6g	par-6 partitioning defective 6 homolog gamma (C. elegans)
1419499_at	1.53521	0.045616	Gpam	glycerol-3-phosphate acyltransferase, mitochondrial
1447683_x_at	1.5351	0.0118925	Mettl1	methyltransferase like 1
1416267_at	1.52869	0.00238669	Scoc	short coiled-coil protein
1417961_a_at	-1.52799	0.00612104	Trim30a	tripartite motif-containing 30A
1448609_at	-1.52565	0.0103876	Tst	thiosulfate sulfurtransferase, mitochondrial
1416569_at	1.5255	0.00118855	Actl6a	actin-like 6A
1430979_a_at	1.52549	0.0110715	Prdx2	peroxiredoxin 2
1442588_at	-1.52172	0.00929131	Gm5101	predicted gene 5101
1418744_s_at	-1.5215	0.0132576	Tesc	tescalcin
1420502_at	-1.52083	0.0246539	Sat1	spermidine/spermine N1-acetyl transferase 1
1434524_at	1.52059	0.00899303	Eif2b3	eukaryotic translation initiation factor 2B, subunit 3
1435083_at	1.51996	0.00486085	Ctxn1	cortexin 1
1455991_at	1.51952	0.0166747	Ccbl2	cysteine conjugate-beta lyase 2
1451475_at	-1.51664	0.0360502	Plxnd1	plexin D1
1416616_s_at	1.5149	0.0333908	Clpp	caseinolytic peptidase, ATP-dependent, proteolytic subunit homolog (E. coli)
1429900_at	-1.51442	0.00790851	5330406M23Rik	RIKEN cDNA 5330406M23 gene
1434585_at	1.51435	0.0120866	Tulp4	tubby like protein 4
1456150_at	-1.51424	0.00708194	Jhdm1d	jumonji C domain-containing histone demethylase 1 homolog D (S. cerevisiae)
1429168_at	1.51412	0.0139909	Zbtb46	zinc finger and BTB domain containing 46
1430556_at	-1.51319	0.0125391	Spag9	sperm associated antigen 9
1424049_at	1.512	0.0039297	Lrrc42	leucine rich repeat containing 42
1416439_at	1.51063	0.00905256	Dctpp1	dCTP pyrophosphatase 1
1447993_a_at	1.51016	0.00790582	Snhg10	small nucleolar RNA host gene (non-protein coding) 10
1453004_at	1.51	0.00368125	Slc22a23	solute carrier family 22, member 23
1418355_at	-1.50963	0.0385345	Nucb2	nucleobindin 2
1452817_at	1.50884	0.0214	Smyd3	SET and MYND domain containing 3
1420843_at	1.50714	0.00105709	Ptprf	protein tyrosine phosphatase, receptor type, F
1449648_s_at	1.50575	0.0063246	Polr1c	polymerase (RNA) I polypeptide C
1453113_at	1.50509	0.0138187	Wdsub1	WD repeat, SAM and U-box domain containing 1
1430536_a_at	1.50496	0.00501456	Erh	enhancer of rudimentary homolog (Drosophila)
1453063_at	1.50406	0.00124697	Cltb	clathrin, light polypeptide (Lcb)
1440982_at	-1.50302	0.027992	LOC552909	uncharacterized LOC552909
1416155_at	1.50225	0.00086792	Hmgb3	high mobility group box 3
1416586_at	1.50212	0.00965429	Zfp239	zinc finger protein 239
1454654_at	-1.50111	0.0334933	Dirc2	disrupted in renal carcinoma 2 (human)
1442256_at	-1.50088	0.00940605	Prkcd	protein kinase C, delta
1423946_at	-1.50031	0.0369208	Pdlim2	PDZ and LIM domain 2
1458462_at	-1.50007	0.00564418	Arhgap30	Rho GTPase activating protein 30
1430064_at	-1.49982	0.0152028	Ttll11	tubulin tyrosine ligase-like family, member 11
1428662_a_at	1.49958	0.0330544	Hopx	HOP homeobox
1423161_s_at	1.49872	0.00849184	Spred1	sprouty protein with EVH-1 domain 1, related sequence
1451144_at	1.49765	0.00358606	Brix1	BRX1, biogenesis of ribosomes, homolog (S. cerevisiae)
1440816_x_at	1.4969	0.00125682	Ddx1	DEAD (Asp-Glu-Ala-Asp) box polypeptide 1
1439402_at	-1.49627	0.00170173	4930444F02Rik	RIKEN cDNA 4930444F02 gene
1417667_a_at	1.49619	0.0039863	Pter	phosphotriesterase related
1439189_at	1.49583	0.00511766	Fnip2	folliculin interacting protein 2
1435787_at	1.49496	0.0030964	Ppm1l	protein phosphatase 1 (formerly 2C)-like
1440629_at	-1.49484	0.0232136	Etf1	eukaryotic translation termination factor 1
1443185_at	-1.49442	0.00473444	Lhfpl2	lipoma HMGIC fusion partner-like 2
1427447_a_at	-1.49407	0.00136396	Triobp	TRIO and F-actin binding protein
1451016_at	1.4933	0.00215643	Ifrd2	interferon-related developmental regulator 2
1443559_at	-1.49291	0.00265613	Rsrc2	arginine/serine-rich coiled-coil 2
1455244_at	1.4926	0.0161439	Daam1	dishevelled associated activator of morphogenesis 1
1421662_a_at	1.49252	0.0115374	Tusc3	tumor suppressor candidate 3
1423969_at	1.49212	0.0122293	Nup37	nucleoporin 37
1450379_at	-1.4905	0.0144544	Msn	moesin
1448013_at	1.48987	0.0011899	Usp24	ubiquitin specific peptidase 24
1434045_at	-1.48858	0.00247009	Cdkn1b	cyclin-dependent kinase inhibitor 1B
1429268_at	1.48849	0.00613692	2610318N02Rik	RIKEN cDNA 2610318N02 gene
1434112_at	1.48831	0.0114191	Lphn2	latrophilin 2
1449019_at	1.48768	0.0113743	Akap1	A kinase (PRKA) anchor protein 1
1433959_at	1.48731	0.00310928	Zmat4	zinc finger, matrin type 4
1451064_a_at	1.4856	0.0369841	Psat1	phosphoserine aminotransferase 1
1415978_at	1.48381	0.0436881	Tubb3	tubulin, beta 3 class III
1434267_at	1.48343	0.00355749	Nek1	NIMA (never in mitosis gene a)-related expressed kinase 1
1416585_at	1.48322	0.00803815	Ruvbl1	RuvB-like protein 1
1450484_a_at	-1.48312	0.00731386	Cmpk2	cytidine monophosphate (UMP-CMP) kinase 2, mitochondrial
1449147_at	1.48209	0.0237439	Chst1	carbohydrate (keratan sulfate Gal-6) sulfotransferase 1
1434143_at	1.48179	0.00923194	Atmin	ATM interactor
1420616_at	1.481	0.00508179	Ash2l	ash2 (absent, small, or homeotic)-like (Drosophila)
1426481_at	1.48085	0.0220859	Klhl22	kelch-like 22 (Drosophila)
1422449_s_at	1.48059	0.0239601	Rcn2	reticulocalbin 2
1423299_at	1.48054	0.00459152	Txnl1	thioredoxin-like 1
1435290_x_at	1.48023	0.00099404	H2-Aa	histocompatibility 2, class II antigen A, alpha
1449814_at	1.47972	0.00847619	Frat1	frequently rearranged in advanced T cell lymphomas
1437883_s_at	-1.47966	0.0236137	Pan3	PAN3 polyA specific ribonuclease subunit homolog (S. cerevisiae)
1416890_at	1.47888	0.0191002	Wdr74	WD repeat domain 74
1428793_at	-1.47606	0.00415641	Slc36a1	solute carrier family 36 (proton/amino acid symporter), member 1
1428193_at	1.47576	0.000936239	Usp9x	ubiquitin specific peptidase 9, X chromosome
1424315_at	1.472	0.0113629	1110004E09Rik	RIKEN cDNA 1110004E09 gene
1416837_at	1.47189	0.0137277	Bax	BCL2-associated X protein
1424777_at	1.47089	0.0044711	Dcaf4	DDB1 and CUL4 associated factor 4
1424828_a_at	1.46984	0.0219727	Fh1	fumarate hydratase 1
1441829_s_at	-1.46975	0.0083441	Akap10	A kinase (PRKA) anchor protein 10
1422731_at	1.46961	0.0264954	Limd1	LIM domains containing 1
1442151_at	-1.46926	0.00449765	D230040A04Rik	RIKEN cDNA D230040A04 gene
1421836_at	1.46821	0.0157611	Mtap7	microtubule-associated protein 7
1424942_a_at	1.4682	0.00511753	Myc	myelocytomatosis oncogene
1417049_at	1.46755	0.00885756	Rhd	Rh blood group, D antigen
1450706_a_at	1.46754	0.00157729	Arl3	ADP-ribosylation factor-like 3
1447631_at	-1.46703	0.0042582	Myst2	MYST histone acetyltransferase 2
1450423_s_at	1.4665	0.0127525	Rpf2	ribosome production factor 2 homolog (S. cerevisiae)
1437448_s_at	1.46521	0.00324521	Ctnnd1	catenin (cadherin associated protein), delta 1
1437199_at	-1.46492	0.0360154	Dusp5	dual specificity phosphatase 5
1442903_at	1.46486	0.0286973	4732423E21Rik	RIKEN cDNA 4732423E21 gene
1426223_at	-1.46484	0.0308403	Ttc39c	tetratricopeptide repeat domain 39C
1420712_a_at	1.46474	0.0292854	Hpn	hepsin
1452048_at	1.4633	0.0320966	Mrpl12	mitochondrial ribosomal protein L12
1457676_at	-1.46274	0.0169747	Tirap	toll-interleukin 1 receptor (TIR) domain-containing adaptor protein
1450860_at	1.46252	0.0194	Lap3	leucine aminopeptidase 3
1421260_a_at	1.46139	0.0315858	Srm	spermidine synthase
1424530_at	1.46042	0.00210228	Sec14l2	SEC14-like 2 (S. cerevisiae)
1443798_at	-1.45988	0.00397442	Pik3cd	phosphatidylinositol 3-kinase catalytic delta polypeptide
1416093_a_at	1.45961	0.00916973	Mrpl20	mitochondrial ribosomal protein L20
1442148_at	1.45791	0.00299503	Psip1	PC4 and SFRS1 interacting protein 1
1438666_at	-1.45755	0.0401395	Ldlrad3	low density lipoprotein receptor class A domain containing 3
1457631_at	-1.45704	0.00148486	2310047N11Rik	RIKEN cDNA 2310047N11 gene
1448786_at	-1.45617	0.0437593	Plbd1	phospholipase B domain containing 1
1431374_at	-1.45605	0.00292014	6330407A03Rik	RIKEN cDNA 6330407A03 gene
1450724_at	1.45538	0.00245968	Fam126a	family with sequence similarity 126, member A
1437274_at	-1.45509	0.0212024	Copa	coatomer protein complex subunit alpha
1421129_a_at	-1.45501	0.00434119	Atp2a3	ATPase, Ca++ transporting, ubiquitous
1451400_at	1.45486	0.0139649	Gemin8	gem (nuclear organelle) associated protein 8
1443088_at	-1.45397	0.00643429	9930031P18Rik	RIKEN cDNA 9930031P18 gene
1438480_a_at	1.45392	0.00653873	Thyn1	thymocyte nuclear protein 1
1458150_at	-1.45315	0.00296867	Ambra1	autophagy/beclin 1 regulator 1
1423957_at	1.45272	0.00096407	Aen	apoptosis enhancing nuclease
1418503_at	1.45179	0.00713729	Hspa9	heat shock protein 9
1444456_at	-1.45128	0.012093	9030425P06Rik	RIKEN cDNA 9030425P06 gene
1424440_at	1.45115	0.00524657	Mrps6	mitochondrial ribosomal protein S6
1447184_at	1.45099	0.0240482	AU021760	expressed sequence AU021760
1428369_s_at	1.45009	0.00423629	Arhgap21	Rho GTPase activating protein 21
1455493_at	-1.45008	0.0376216	Syne1	synaptic nuclear envelope 1
1449085_at	1.45005	0.00454425	Phf10	PHD finger protein 10
1418694_at	1.45005	0.00179041	Kcmf1	potassium channel modulatory factor 1
1417663_a_at	1.44928	0.00680324	Ndrg3	N-myc downstream regulated gene 3
1426511_at	1.44897	0.0103308	Susd2	sushi domain containing 2
1457539_at	-1.4479	0.0187289	D10Ertd709e	DNA segment, Chr 10, ERATO Doi 709, expressed
1420398_at	-1.44597	0.018979	Rgs18	regulator of G-protein signaling 18
1417499_at	1.44503	0.00975924	Timm10	translocase of inner mitochondrial membrane 10 homolog (yeast)
1425891_a_at	1.4447	0.00251309	Grtp1	GH regulated TBC protein 1
1450004_at	1.4446	0.0380281	Tslp	thymic stromal lymphopoietin
1438834_at	-1.44364	0.02314	Mospd2	motile sperm domain containing 2
1457824_at	-1.44334	0.0222714	Plscr1	phospholipid scramblase 1
1438234_at	-1.44205	0.00604848	Wdr26	WD repeat domain 26
1419165_at	1.44168	0.00935647	Zfp260	zinc finger protein 260
1460239_at	1.44077	0.0248479	Tspan13	tetraspanin 13
1435728_at	1.44055	0.00605171	Tyw3	tRNA-yW synthesizing protein 3 homolog (S. cerevisiae)
1457281_at	1.44033	0.00707689	Dnajc21	DnaJ (Hsp40) homolog, subfamily C, member 21
1439808_at	-1.44024	0.0412467	Ipcef1	interaction protein for cytohesin exchange factors 1
1458644_at	1.4402	0.0238776	Ccdc62	coiled-coil domain containing 62
1430672_at	-1.43993	0.00436345	5033418A18Rik	RIKEN cDNA 5033418A18 gene
1426381_at	1.43426	0.0151641	Pprc1	peroxisome proliferative activated receptor, gamma, coactivator-related 1
1427997_at	1.43389	0.00489122	Ndufaf4	NADH dehydrogenase (ubiquinone) 1 alpha subcomplex, assembly factor 4
1418986_a_at	1.43367	0.00238695	Uxt	ubiquitously expressed transcript
1439027_at	1.43129	0.00451793	Naa25	N(alpha)-acetyltransferase 25, NatB auxiliary subunit
1448371_at	1.42922	0.00287143	Mylpf	myosin light chain, phosphorylatable, fast skeletal muscle
1417511_at	1.42853	0.00791131	Lyar	Ly1 antibody reactive clone
1433692_at	1.42692	0.00436345	Nat10	N-acetyltransferase 10
1419219_at	-1.4264	0.0245459	Cyp4f18	cytochrome P450, family 4, subfamily f, polypeptide 18
1434830_at	-1.42496	0.0111698	Mxd1	MAX dimerization protein 1
1420548_a_at	1.42475	0.0173755	2310008H09Rik	RIKEN cDNA 2310008H09 gene
1452078_a_at	1.42451	0.00483224	Slc11a2	solute carrier family 11 (proton-coupled divalent metal ion transporters), member 2
1428866_at	-1.42439	0.0318596	2810037O22Rik	RIKEN cDNA 2810037O22 gene
1433656_a_at	1.42303	0.00675569	Gnl3	guanine nucleotide binding protein-like 3 (nucleolar)
1435064_a_at	1.42208	0.0204528	Tmem27	transmembrane protein 27
1424370_s_at	1.42192	0.00935201	Psmf1	proteasome (prosome, macropain) inhibitor subunit 1
1450629_at	-1.42174	0.00737006	Lima1	LIM domain and actin binding 1
1433851_at	1.41948	0.0119355	Ppp4r2	protein phosphatase 4, regulatory subunit 2
1426607_at	1.41903	0.00497789	Gm7120	predicted gene 7120
1429399_at	-1.41886	0.00528012	Rnf125	ring finger protein 125
1434278_at	1.41835	0.00904296	Mtm1	X-linked myotubular myopathy gene 1
1432757_at	-1.4183	0.00974171	2900011L18Rik	RIKEN cDNA 2900011L18 gene
1433203_at	-1.41805	0.0217676	6030400A10Rik	RIKEN cDNA 6030400A10 gene
1433979_at	1.41769	0.00907414	Rbms2	RNA binding motif, single stranded interacting protein 2
1432188_s_at	1.41714	0.00384425	Nup43	nucleoporin 43
1428416_at	1.41628	0.0143914	Fam164a	family with sequence similarity 164, member A
1438751_at	1.41623	0.0266681	Slc30a10	solute carrier family 30, member 10
1435945_a_at	1.41584	0.0116058	Kcnn4	potassium intermediate/small conductance calcium-activated channel, subfamily N, member 4
1439768_x_at	-1.41556	0.00225361	Sema4f	sema domain, immunoglobulin domain (Ig), TM domain, and short cytoplasmic domain
1452714_at	-1.41556	0.0260846	Tanc1	tetratricopeptide repeat, ankyrin repeat and coiled-coil containing 1
1418463_at	1.4153	0.00511766	Pik3r2	phosphatidylinositol 3-kinase, regulatory subunit, polypeptide 2 (p85 beta)
1431893_a_at	1.41518	0.0106457	Pdss1	prenyl (solanesyl) diphosphate synthase, subunit 1
1460204_at	-1.41364	0.011255	Tec	tec protein tyrosine kinase
1442862_at	-1.41339	0.0037937	Ccdc88c	coiled-coil domain containing 88C
1451562_at	1.41337	0.00281242	A2ld1	AIG2-like domain 1
1418096_at	-1.4125	0.0267932	Dok3	docking protein 3
1424719_a_at	1.41241	0.00361626	Mapt	microtubule-associated protein tau
1424167_a_at	1.41194	0.0353098	Pmm1	phosphomannomutase 1
1416343_a_at	-1.41157	0.0412191	Lamp2	lysosomal-associated membrane protein 2
1434097_at	1.41071	0.00139052	Zfp930	zinc finger protein 930
1451479_a_at	-1.41057	0.0088254	Tmem53	transmembrane protein 53
1426460_a_at	-1.41032	0.0247031	Ugp2	UDP-glucose pyrophosphorylase 2
1443409_at	-1.40901	0.00296867	C76434	expressed sequence C76434
1453586_at	-1.40899	0.0286163	Entpd1	ectonucleoside triphosphate diphosphohydrolase 1
1440083_at	-1.40878	0.00436574	A430061O12Rik	RIKEN cDNA A430061O12 gene
1420909_at	-1.40855	0.0241738	Vegfa	vascular endothelial growth factor A
1435803_a_at	1.40823	0.00329539	Eif4e2	eukaryotic translation initiation factor 4E member 2
1440298_at	-1.40798	0.00377583	Treml2	triggering receptor expressed on myeloid cells-like 2
1448480_at	1.40763	0.00436574	Nip7	nuclear import 7 homolog (S. cerevisiae)
1437089_at	1.40753	0.044728	Pyroxd2	pyridine nucleotide-disulphide oxidoreductase domain 2
1455467_at	1.40698	0.00310928	Fam188b	family with sequence similarity 188, member B
1434350_at	-1.40698	0.00868807	Csrnp1	cysteine-serine-rich nuclear protein 1
1448907_at	1.40678	0.00411556	Thop1	thimet oligopeptidase 1
1417985_at	-1.40558	0.00764221	Nrarp	Notch-regulated ankyrin repeat protein
1433751_at	1.4053	0.0433003	Slc39a10	solute carrier family 39 (zinc transporter), member 10
1439148_a_at	1.40449	0.013821	Pfkl	phosphofructokinase, liver, B-type
1429058_at	1.40442	0.03172	Tmem107	transmembrane protein 107
1442693_at	-1.40441	0.000970498	Trim5	tripartite motif-containing 5
1429735_at	-1.40368	0.00670437	Qk	quaking
1452630_at	1.40353	0.0042582	Treml1	triggering receptor expressed on myeloid cells-like 1
1449194_at	1.40321	0.0110715	Mrps25	mitochondrial ribosomal protein S25
1441081_a_at	1.40251	0.0430175	1110038B12Rik	RIKEN cDNA 1110038B12 gene
1418915_at	1.40236	0.00868387	Mmachc	methylmalonic aciduria cblC type, with homocystinuria
1418406_at	-1.40228	0.0373192	Pde8a	phosphodiesterase 8A
1434148_at	1.40227	0.0164546	Tcf4	transcription factor 4
1425189_a_at	1.40163	0.00692899	Mrpl15	mitochondrial ribosomal protein L15
1457884_at	-1.40147	0.00909692	4732496C06Rik	RIKEN cDNA 4732496C06 gene
1446968_at	-1.40108	0.041945	Picalm	phosphatidylinositol binding clathrin assembly protein
1453252_at	1.4009	0.0030303	Dus4l	dihydrouridine synthase 4-like (S. cerevisiae)
1428593_at	1.40032	0.00316601	1700029F09Rik	RIKEN cDNA 1700029F09 gene
1424420_at	-1.39832	0.0281635	Ccpg1	cell cycle progression 1
1435676_at	-1.39784	0.00744454	Cep164	centrosomal protein 164
1438871_at	-1.39752	0.00434119	LOC100503146	uncharacterized LOC100503146
1452359_at	-1.39748	0.00948899	Rell1	RELT-like 1
1451605_at	1.39713	0.011889	Dyx1c1	dyslexia susceptibility 1 candidate 1 homolog (human)
1440826_s_at	1.39674	0.0404836	2610002I17Rik	RIKEN cDNA 2610002I17
1434405_at	-1.39653	0.0134316	Fnip1	folliculin interacting protein 1
1451901_at	-1.39575	0.00607009	Hltf	helicase-like transcription factor
1419296_at	-1.39399	0.00259488	Arhgap4	Rho GTPase activating protein 4
1442901_at	-1.39386	0.00714549	Tax1bp1	Tax1 (human T cell leukemia virus type I) binding protein 1
1438420_at	-1.39377	0.00355714	Rbm39	RNA binding motif protein 39
1458355_x_at	1.39362	0.00423629	Wdr92	WD repeat domain 92
1433986_at	1.39214	0.0197667	BC024659	cDNA sequence BC024659
1449633_s_at	1.39004	0.00436345	Nt5c3l	5'-nucleotidase, cytosolic III-like
1424746_at	1.38994	0.00594982	Kif1c	kinesin family member 1C
1444137_at	1.3894	0.00528012	A430108G06Rik	RIKEN cDNA A430108G06 gene
1456099_at	-1.38867	0.00426728	D930017J03Rik	RIKEN cDNA D930017J03 gene
1423570_at	1.3879	0.00601488	Abcg1	ATP-binding cassette, sub-family G (WHITE), member 1
1454397_at	-1.38767	0.00589147	4632418H02Rik	RIKEN cDNA 4632418H02 gene
1424520_at	1.38631	0.00436345	2010305A19Rik	RIKEN cDNA 2010305A19 gene
1429061_at	1.38519	0.00668065	1810063B05Rik	RIKEN cDNA 1810063B05 gene
1444408_at	-1.38425	0.0132358	B130040O20Rik	RIKEN cDNA B130040O20 gene
1416782_s_at	1.38355	0.00675874	Praf2	PRA1 domain family 2
1449077_at	1.38142	0.0198617	Ahsp	alpha hemoglobin stabilizing protein
1451507_at	1.38096	0.00737006	Mef2c	myocyte enhancer factor 2C
1452481_at	-1.37896	0.0107832	Plcb2	phospholipase C, beta 2
1434223_at	-1.37871	0.0401522	Oscp1	organic solute carrier partner 1
1435040_at	-1.37867	0.0363014	Irak3	interleukin-1 receptor-associated kinase 3
1450244_a_at	-1.37825	0.0307936	Map4k2	mitogen-activated protein kinase kinase kinase kinase 2
1430705_at	-1.37816	0.00637441	Puf60	poly-U binding splicing factor 60
1416950_at	-1.37765	0.0134316	Tnfaip8	tumor necrosis factor, alpha-induced protein 8
1435841_s_at	1.37721	0.0173755	Suclg2	succinate-Coenzyme A ligase, GDP-forming, beta subunit
1432294_at	-1.37713	0.0431049	9330177L23Rik	RIKEN cDNA 9330177L23 gene
1443849_x_at	1.37453	0.0243285	Urod	uroporphyrinogen decarboxylase
1434603_at	-1.37425	0.00343998	Med13l	mediator complex subunit 13-like
1419557_a_at	1.37368	0.00614091	Tmem9	transmembrane protein 9
1439516_at	1.37359	0.0491243	2610201A13Rik	RIKEN cDNA 2610201A13 gene
1459987_s_at	1.37291	0.016553	Cct3	chaperonin containing Tcp1, subunit 3 (gamma)
1449443_at	1.37235	0.0377311	Decr1	2,4-dienoyl CoA reductase 1, mitochondrial
1442599_at	-1.37219	0.0370122	Slc12a9	solute carrier family 12 (potassium/chloride transporters), member 9
1451365_at	1.37215	0.0177507	Rbm19	RNA binding motif protein 19
1455694_at	-1.37206	0.0446205	Nbeal2	neurobeachin-like 2
1439281_at	-1.37185	0.00133024	Slc26a8	solute carrier family 26, member 8
1440609_at	-1.37109	0.00624146	Map4k4	mitogen-activated protein kinase kinase kinase kinase 4
1429709_at	1.37024	0.00975924	Pmpcb	peptidase (mitochondrial processing) beta
1421118_a_at	1.36998	0.00378672	Gpr56	G protein-coupled receptor 56
1449356_at	-1.36876	0.0053527	Asb5	ankyrin repeat and SOCs box-containing 5
1457802_at	-1.36856	0.00314656	B930012P20Rik	RIKEN cDNA B930012P20 gene
1437500_at	1.36819	0.00186069	Noc3l	nucleolar complex associated 3 homolog (S. cerevisiae)
1449006_at	-1.36778	0.0018786	Gla	galactosidase, alpha
1458202_at	-1.36773	0.0166602	Fam65b	family with sequence similarity 65, member B
1455633_at	1.36735	0.00452306	Zfp647	zinc finger protein 647
1446972_at	1.36663	0.025774	D15Wsu126e	DNA segment, Chr 15, Wayne State University 126, expressed
1426609_at	1.36624	0.00887627	Dis3	DIS3 mitotic control homolog (S. cerevisiae)
1417612_at	-1.36616	0.0171004	Ier5	immediate early response 5
1449821_a_at	1.36515	0.00706866	Memo1	mediator of cell motility 1
1448488_at	1.36453	0.00892116	Mrps5	mitochondrial ribosomal protein S5
1423169_at	-1.36442	0.00511766	Taf7	TAF7 RNA polymerase II, TATA box binding protein (TBP)-associated factor
1435675_at	1.36389	0.00479349	Tbc1d12	TBC1D12: TBC1 domain family, member 12
1435839_at	-1.36381	0.0164283	Gm7694	predicted gene 7694
1443092_at	-1.36255	0.0260846	Mtmr3	myotubularin related protein 3
1455771_at	-1.36215	0.0121343	Bzrap1	benzodiazepine receptor associated protein 1
1430835_at	-1.36169	0.0463683	Ccdc125	coiled-coil domain containing 125
1435118_at	1.36156	0.00658921	Tsen2	tRNA splicing endonuclease 2 homolog (S. cerevisiae)
1440022_at	-1.36129	0.00209222	Poldip3	polymerase (DNA-directed), delta interacting protein 3
1430653_at	1.36078	0.00402416	A930026B05Rik	RIKEN cDNA A930026B05 gene
1455684_at	-1.36077	0.0132121	Map3k9	mitogen-activated protein kinase kinase kinase 9
1434313_at	-1.36076	0.0475185	Ccdc126	coiled-coil domain containing 126
1418014_a_at	-1.36042	0.00720584	B4galt1	UDP-Gal:betaGlcNAc beta 1,4- galactosyltransferase, polypeptide 1
1455673_at	1.36008	0.0277782	Alkbh2	alkB, alkylation repair homolog 2 (E. coli)
1429671_at	1.35946	0.00489122	2410018M08Rik	RIKEN cDNA 2410018M08 gene
1435630_s_at	1.35825	0.00732172	Acat2	acetyl-Coenzyme A acetyltransferase 2
1428704_at	1.3564	0.00189909	Zfp661	zinc finger protein 661
1425088_at	-1.35417	0.0464839	Scnn1a	sodium channel, nonvoltage-gated 1 alpha
1442409_at	-1.3534	0.00259488	D9Wsu90e	DNA segment, Chr 9, Wayne State University 90, expressed
1418324_at	1.35234	0.00258629	Fem1b	feminization 1 homolog b (C. elegans)
1435209_at	1.35183	0.027992	BC057079	cDNA sequence BC057079
1416345_at	1.35091	0.0092462	Timm8a1	translocase of inner mitochondrial membrane 8 homolog a1 (yeast)
1435389_at	1.35041	0.0216133	Reps2	RALBP1 associated Eps domain containing protein 2
1429092_at	1.34942	0.00470663	Vkorc1l1	vitamin K epoxide reductase complex, subunit 1-like 1
1435901_at	1.34886	0.0150672	Usp40	ubiquitin specific peptidase 40
1416376_at	1.3484	0.00571969	Tmem97	transmembrane protein 97
1441233_at	-1.34717	0.0136711	Gm19858	predicted gene, 19858
1434576_at	1.34689	0.0016769	Tsga14	testis specific gene A14
1419722_at	1.34683	0.0204932	Klk8	kallikrein related-peptidase 8
1428874_at	1.34608	0.00744747	Fam96b	family with sequence similarity 96, member B
1433834_at	1.3459	0.00367181	2006-03-01	membrane-associated ring finger (C3HC4) 6
1429881_at	-1.34544	0.0338466	Arhgap15	Rho GTPase activating protein 15
1434671_at	1.34524	0.00489122	B230337E12Rik	RIKEN cDNA B230337E12 gene
1426631_at	1.34514	0.0155331	Pus7	pseudouridylate synthase 7 homolog (S. cerevisiae)
1427153_at	1.34509	0.0175065	Bckdhb	branched chain ketoacid dehydrogenase E1, beta polypeptide
1451026_at	1.34479	0.0278382	Ftsj3	FtsJ homolog 3 (E. coli)
1435266_at	1.34475	0.0227445	Scai	suppressor of cancer cell invasion
1416202_at	1.34438	0.0188764	Phb2	prohibitin 2
1423768_at	-1.34342	0.0295351	Unc93b1	unc-93 homolog B1 (C. elegans)
1417290_at	-1.34288	0.0222645	Lrg1	leucine-rich alpha-2-glycoprotein 1
1441069_at	1.3428	0.00218049	Zdhhc23	zinc finger, DHHC domain containing 23
1448523_at	1.34258	0.00415806	Nphp1	nephronophthisis 1 (juvenile) homolog (human)
1451253_at	-1.34234	0.00779848	Pxk	PX domain containing serine/threonine kinase
1435384_at	1.34195	0.00637441	Ube2n	ubiquitin-conjugating enzyme E2N
1426946_at	1.3407	0.00370404	Ipo5	importin 5
1438172_x_at	1.34046	0.0010342	Eri2	exoribonuclease 2
1428082_at	1.34005	0.00164493	Acsl5	acyl-CoA synthetase long-chain family member 5
1415950_a_at	1.34002	0.0189947	Pebp1	phosphatidylethanolamine binding protein 1
1456353_at	-1.33999	0.00739273	Supt4h1	suppressor of Ty 4 homolog 1 (S. cerevisiae)
1424448_at	-1.33969	0.00244478	Trim6	tripartite motif-containing 6
1427102_at	-1.33929	0.00637441	Slfn4	schlafen 4
1424323_at	1.33689	0.0295283	Noc2l	nucleolar complex associated 2 homolog (S. cerevisiae)
1428519_at	1.33651	0.0172324	2610528E23Rik	RIKEN cDNA 2610528E23 gene
1423186_at	-1.33558	0.0316807	Tiam2	T cell lymphoma invasion and metastasis 2
1434586_a_at	1.3352	0.0218129	Ptdss2	phosphatidylserine synthase 2
1449122_at	1.33407	0.00209222	Ubxn2b	UBX domain protein 2B
1457724_at	-1.33064	0.0119299	Ctsl	cathepsin L
1437638_at	-1.33042	0.0174162	Srrm2	serine/arginine repetitive matrix 2
1418908_at	-1.32974	0.0123654	Pam	peptidylglycine alpha-amidating monooxygenase
1421999_at	-1.32913	0.0273732	Tshr	thyroid stimulating hormone receptor
1417826_at	1.32809	0.00192145	Akr1e1	aldo-keto reductase family 1, member E1
1454642_a_at	1.32768	0.00412002	Commd3	COMM domain containing 3
1449097_at	1.32756	0.00895681	Txnrd2	thioredoxin reductase 2
1435057_x_at	1.32661	0.00621235	Polr1e	polymerase (RNA) I polypeptide E
1456505_at	-1.32615	0.00566203	Braf	Braf transforming gene
1441145_at	-1.32593	0.00379322	Phf21a	PHD finger protein 21A
1433645_at	1.32577	0.0333908	Slc44a1	solute carrier family 44, member 1
1428505_at	1.32529	0.02797	Ccdc90b	coiled-coil domain containing 90B
1452151_at	1.32498	0.0432436	Gramd4	GRAM domain containing 4
1437705_at	1.32442	0.00780568	Zfp551	zinc fingr protein 551
1429184_at	-1.32371	0.0185786	Gvin1	GTPase, very large interferon inducible 1
1432998_at	-1.32341	0.0310822	5830462O15Rik	RIKEN cDNA 5830462O15 gene
1417000_at	-1.32293	0.0115403	Abtb1	ankyrin repeat and BTB (POZ) domain containing 1
1426288_at	-1.32244	0.018681	Lrp4	low density lipoprotein receptor-related protein 4
1456659_at	-1.32228	0.00232414	LOC552902	uncharacterized LOC552902
1430191_at	-1.32228	0.0074105	9130004J05Rik	RIKEN cDNA 9130004J05 gene
1435132_at	-1.3209	0.00512582	Disp1	dispatched homolog 1 (Drosophila)
1456746_a_at	1.32084	0.00532233	Cd99l2	CD99 antigen-like 2
1418181_at	1.32074	0.0442564	Ptp4a3	protein tyrosine phosphatase 4a3
1433622_at	1.32049	0.00381499	Gemin4	gem (nuclear organelle) associated protein 4
1435484_at	1.32008	0.0164546	Slc5a3	solute carrier family 5 (inositol transporters), member 3
1424460_s_at	-1.31977	0.00426728	Lpcat1	lysophosphatidylcholine acyltransferase 1
1457001_at	-1.31954	0.00595075	Cenpk	centromere protein K
1452252_at	1.31937	0.00708194	Utp20	UTP20, small subunit (SSU) processome component, homolog (yeast)
1451428_x_at	1.31922	0.00616008	Egfl7	EGF-like domain 7
1454632_at	-1.3191	0.0440081	Tmem229b	transmembrane protein 229B
1429270_a_at	1.31845	0.0259813	Syce2	synaptonemal complex central element protein 2
1448784_at	1.31837	0.0240401	Taf10	TAF10 RNA polymerase II, TATA box binding protein (TBP)-associated factor
1452704_at	1.3175	0.00561017	Fam82a2	family with sequence similarity 82, member A2
1435682_at	1.31713	0.00503311	Lars2	leucyl-tRNA synthetase, mitochondrial
1460377_a_at	-1.31708	0.00330086	Tmem8	transmembrane protein 8 (five membrane-spanning domains)
1434339_at	-1.31631	0.0473053	Fnbp1l	formin binding protein 1-like
1418474_at	1.31588	0.0306146	Fam158a	family with sequence similarity 158, member A
1435429_x_at	1.31468	0.00436345	Rps27l	ribosomal protein S27-like
1438519_at	-1.3141	0.0299097	Klhl24	kelch-like 24 (Drosophila)
1419971_s_at	-1.31297	0.0351612	Slc35a5	solute carrier family 35, member A5
1429110_a_at	1.31287	0.0459617	Nsun4	NOL1/NOP2/Sun domain family, member 4
1431861_a_at	1.31261	0.0059696	Odf2l	outer dense fiber of sperm tails 2-like
1415874_at	1.31237	0.0133762	Spry1	sprouty homolog 1 (Drosophila)
1458438_at	-1.31209	0.00489122	Ccdc122	coiled-coil domain containing 122
1424262_at	-1.31103	0.00720584	Aif1l	allograft inflammatory factor 1-like
1416106_at	1.31058	0.0492373	Kti12	KTI12 homolog, chromatin associated (S. cerevisiae)
1453844_at	-1.3104	0.00459618	Chit1	chitinase 1 (chitotriosidase)
1435287_at	1.30994	0.0207192	Add2	adducin 2 (beta)
1457768_at	-1.30989	0.00262722	Prune	prune homolog (Drosophila)
1454893_at	1.30916	0.00728286	Fam189b	family with sequence similarity 189, member B
1428157_at	-1.30783	0.0409715	Gng2	guanine nucleotide binding protein (G protein), gamma 2
1418219_at	-1.30777	0.0413694	Il15	interleukin 15
1443145_at	-1.30699	0.0415061	Apbb1ip	amyloid beta (A4) precursor protein-binding, family B, member 1 interacting protein
1416510_at	1.30611	0.0282596	Mrpl4	mitochondrial ribosomal protein L4
1450668_s_at	1.30554	0.0407063	Hspe1	heat shock protein 1 (chaperonin 10)
1426735_at	1.30477	0.0113743	Iars2	isoleucine-tRNA synthetase 2, mitochondrial
1425065_at	-1.3034	0.00152955	Oas2	2'-5' oligoadenylate synthetase 2
1424353_at	1.30277	0.0129118	Lrpprc	leucine-rich PPR-motif containing
1437285_at	1.30255	0.00616008	1110020G09Rik	RIKEN cDNA 1110020G09 gene
1428543_at	1.30182	0.00675874	Ppat	phosphoribosyl pyrophosphate amidotransferase
1452942_at	-1.30136	0.016083	Tmem65	transmembrane protein 65
1429104_at	-1.30136	0.0310148	Limd2	LIM domain containing 2
1441372_at	-1.30126	0.0441369	5930405F01Rik	RIKEN cDNA 5930405F01 gene
1437279_x_at	1.30117	0.0359972	Sdc1	syndecan 1
1429914_at	-1.30043	0.0239187	Epc1	enhancer of polycomb homolog 1 (Drosophila)
1448292_at	1.29959	0.0165314	Uqcr11	ubiquinol-cytochrome c reductase, complex III subunit XI
1454636_at	1.29925	0.00135084	Cbx5	chromobox homolog 5 (Drosophila HP1a)
1426426_at	1.299	0.0042582	Mak16	MAK16 homolog (S. cerevisiae)
1419421_at	1.29827	0.0131403	Ank1	ankyrin 1, erythroid
1459857_at	-1.29825	0.00767375	Usp32	ubiquitin specific peptidase 32
1437200_at	-1.29615	0.0459617	Fcho2	FCH domain only 2
1450504_a_at	1.29598	0.00709541	Agpat3	1-acylglycerol-3-phosphate O-acyltransferase 3
1426217_at	-1.29514	0.00983346	Tmem216	transmembrane protein 216
1424812_at	1.29487	0.0296118	BC017158	cDNA sequence BC017158
1419660_at	1.29464	0.0036145	1600012F09Rik	RIKEN cDNA 1600012F09 gene
1416308_at	-1.29447	0.00949909	Ugdh	UDP-glucose dehydrogenase
1439395_at	1.29409	0.0220722	Zfp874b	zinc finger protein 874b
1448717_at	1.29277	0.00336787	Gcdh	glutaryl-Coenzyme A dehydrogenase
1426398_at	-1.29241	0.00966791	Ube2w	ubiquitin-conjugating enzyme E2W (putative)
1460220_a_at	-1.28978	0.00310928	Csf1	colony stimulating factor 1 (macrophage)
1432016_a_at	1.2897	0.00489904	Idh3a	isocitrate dehydrogenase 3 (NAD+) alpha
1453377_at	1.28919	0.010545	Sh2d4a	SH2 domain containing 4A
1432056_at	1.28859	0.00744747	Cpvl	carboxypeptidase, vitellogenic-like
1439571_at	1.2883	0.00511766	E230008J23Rik	RIKEN cDNA E230008J23 gene
1416893_at	-1.28824	0.00327388	Fam107b	family with sequence similarity 107, member B
1452647_a_at	1.28766	0.00436574	Dph2	DPH2 homolog (S. cerevisiae)
1460333_at	1.28739	0.0177723	Ddx59	DEAD (Asp-Glu-Ala-Asp) box polypeptide 59
1422460_at	1.2873	0.00449444	Mad2l1	MAD2 mitotic arrest deficient-like 1 (yeast)
1434552_at	1.2869	0.00929131	Wdr77	WD repeat domain 77
1416505_at	-1.28667	0.0340674	Nr4a1	nuclear receptor subfamily 4, group A, member 1
1452925_a_at	1.28665	0.0272284	2005-03-01	membrane-associated ring finger (C3HC4) 5
1451461_a_at	1.28634	0.0117535	Aldoc	aldolase C, fructose-bisphosphate
1438781_at	-1.28564	0.00977901	Tet2	tet methylcytosine dioxygenase 2
1429530_a_at	1.2856	0.00595281	Smpd4	sphingomyelin phosphodiesterase 4
1441092_at	-1.28537	0.00186069	9330159M07Rik	RIKEN cDNA 9330159M07 gene
1424161_at	1.28473	0.0334401	Ddx27	DEAD (Asp-Glu-Ala-Asp) box polypeptide 27
1440586_at	-1.28415	0.0265943	B430203I24Rik	RIKEN cDNA B430203I24 gene
1435372_a_at	1.28385	0.00511766	Pa2g4	proliferation-associated 2G4
1458376_at	-1.28351	0.00475962	B930025B16Rik	RIKEN cDNA B930025B16 gene
1454698_at	1.28296	0.0130912	Ptplad1	protein tyrosine phosphatase-like A domain containing 1
1426749_at	1.28291	0.0437593	Prmt3	protein arginine N-methyltransferase 3
1417024_at	1.28268	0.00285464	Hars	histidyl-tRNA synthetase
1425007_at	1.28261	0.0314566	Zfp566	zinc finger protein 566
1451056_at	1.28258	0.00643429	Psmd7	proteasome (prosome, macropain) 26S subunit, non-ATPase, 7
1450866_a_at	1.28254	0.0330632	Mrpl17	mitochondrial ribosomal protein L17
1434865_a_at	1.28249	0.00822647	Exoc7	exocyst complex component 7
1417391_a_at	-1.28237	0.0174514	Il16	interleukin 16
1434306_at	1.2813	0.018574	Rab3ip	RAB3A interacting protein
1435368_a_at	1.28113	0.00643429	Parp1	poly (ADP-ribose) polymerase family, member 1
1422147_a_at	1.2811	0.00790536	Pla2g6	phospholipase A2, group VI
1416071_at	1.28069	0.00372685	Ddx18	DEAD (Asp-Glu-Ala-Asp) box polypeptide 18
1436396_at	1.28061	0.00875217	Wdr60	WD repeat domain 60
1452864_at	1.28039	0.00713975	Med12l	mediator of RNA polymerase II transcription, subunit 12 homolog (yeast)-like
1418137_at	1.28013	0.0178532	Mrp63	mitochondrial ribosomal protein 63
1433962_at	1.27895	0.0325578	Trmt61a	tRNA methyltransferase 61 homolog A (S. cerevisiae)
1455588_at	1.27796	0.0264799	Lyrm4	LYR motif containing 4
1456738_s_at	1.27788	0.00167133	Fam203a	family with sequence similarity 203, member A
1428113_at	1.27768	0.00940154	Tmtc4	transmembrane and tetratricopeptide repeat containing 4
1439094_at	-1.27743	0.00949909	Cltc	clathrin, heavy polypeptide (Hc)
1455262_at	1.27678	0.033306	Thsd4	thrombospondin, type I, domain containing 4
1422631_at	-1.27671	0.0157061	Ahr	aryl-hydrocarbon receptor
1443340_at	-1.27654	0.00794165	Micu1	mitochondrial calcium uptake 1
1455600_at	1.27549	0.0355179	Rps3	ribosomal protein S3
1417348_at	1.27508	0.0109954	2310039H08Rik	RIKEN cDNA 2310039H08 gene
1419093_at	1.27504	0.0107403	Tdo2	tryptophan 2,3-dioxygenase
1431106_a_at	-1.27367	0.0111948	9530053H05Rik	RIKEN cDNA 9530053H05 gene
1428492_at	-1.27242	0.0143626	Glipr2	GLI pathogenesis-related 2
1426076_at	-1.27222	0.0105833	Cdc27	cell division cycle 27 homolog (S. cerevisiae)
1452406_x_at	1.27202	0.0437243	Erdr1	erythroid differentiation regulator 1
1443287_at	-1.27191	0.006473	Gm1337	predicted gene 1337
1421385_a_at	-1.27186	0.0225995	Myo7a	myosin VIIA
1439482_at	1.27151	0.00489122	Uhrf1bp1	UHRF1 (ICBP90) binding protein 1
1427221_at	1.2705	0.00716841	Slc6a20a	solute carrier family 6 (neurotransmitter transporter), member 20A
1451281_at	1.27035	0.025774	Zscan12	zinc finger and SCAN domain containing 12
1454962_at	1.27029	0.0265407	Spire1	spire homolog 1 (Drosophila)
1429521_at	1.26996	0.00489122	Alkbh8	alkB, alkylation repair homolog 8 (E. coli)
1425814_a_at	-1.26953	0.00953692	Calcrl	calcitonin receptor-like
1421739_a_at	-1.26935	0.0262429	Matk	megakaryocyte-associated tyrosine kinase
1433398_at	-1.26796	0.0170708	Fgd3	FYVE, RhoGEF and PH domain containing 3
1454743_at	1.26771	0.0161723	Nup205	nucleoporin 205
1428588_a_at	1.26662	0.0263076	Mrpl41	mitochondrial ribosomal protein L41
1437358_at	-1.26651	0.0282596	Wdfy1	WD repeat and FYVE domain containing 1
1433527_at	1.2661	0.00186069	Ireb2	iron responsive element binding protein 2
1434558_at	1.26434	0.00592069	Wdr47	WD repeat domain 47
1429633_at	-1.26434	0.0133326	Lcor	ligand dependent nuclear receptor corepressor
1423243_at	-1.26394	0.00821254	Mpp1	membrane protein, palmitoylated
1428412_at	1.26366	0.00892116	Tm9sf3	transmembrane 9 superfamily member 3
1455706_at	1.26318	0.00211983	Stxbp4	syntaxin binding protein 4
1438404_at	-1.26309	0.0149645	Rnf144a	ring finger protein 144A
1418634_at	-1.26224	0.0256202	Notch1	Notch gene homolog 1 (Drosophila)
1439467_at	-1.26224	0.0386168	Mtap4	microtubule-associated protein 4
1453008_at	1.2622	0.0106345	Trnp1	TMF1-regulated nuclear protein 1
1419687_at	1.26202	0.0121507	Macrod1	MACRO domain containing 1
1452800_a_at	1.26183	0.00370404	Apoo	apolipoprotein O
1437696_at	1.26074	0.0430193	Zfp948	zinc finger protein 948
1417191_at	-1.26037	0.0161563	Dnajb9	DnaJ (Hsp40) homolog, subfamily B, member 9
1453384_at	-1.25963	0.00270716	Dennd1b	DENN/MADD domain containing 1B
1458559_at	-1.25924	0.0074105	A730028G07Rik	RIKEN cDNA A730028G07 gene
1450880_at	1.25813	0.0136284	Mrpl16	mitochondrial ribosomal protein L16
1453456_at	-1.25753	0.00338644	2900084O13Rik	RIKEN cDNA 2900084O13 gene
1455456_a_at	1.25708	0.03358	Timm50	translocase of inner mitochondrial membrane 50 homolog (yeast)
1454701_at	1.25676	0.0419564	4930503L19Rik	RIKEN cDNA 4930503L19 gene
1448449_at	1.25676	0.0164546	Ripk3	receptor-interacting serine-threonine kinase 3
1419547_at	1.25591	0.0140092	Fahd1	fumarylacetoacetate hydrolase domain containing 1
1418222_at	1.25567	0.0120406	Noa1	nitric oxide associated 1
1433886_at	1.25558	0.0126757	Eif2b5	eukaryotic translation initiation factor 2B, subunit 5 epsilon
1435772_at	-1.25477	0.0334401	Kif21b	kinesin family member 21B
1455726_at	1.2547	0.00436574	Mettl21d	methyltransferase like 21D
1423281_at	1.25468	0.0438264	Stmn2	stathmin-like 2
1424577_at	1.25466	0.0421329	Msto1	misato homolog 1 (Drosophila)
1423923_a_at	1.25402	0.0155331	Wdr8	WD repeat domain 8
1432394_a_at	1.25338	0.0152335	Aatf	apoptosis antagonizing transcription factor
1429453_a_at	1.25333	0.0119522	Mrpl55	mitochondrial ribosomal protein L55
1423481_at	1.25282	0.00725037	Riok2	RIO kinase 2 (yeast)
1416635_at	1.25277	0.0404836	Smpdl3a	sphingomyelin phosphodiesterase, acid-like 3A
1452648_at	1.25243	0.00565319	Tbrg1	transforming growth factor beta regulated gene 1
1424194_at	-1.25132	0.00960613	Rcsd1	RCSD domain containing 1
1450726_at	-1.25113	0.0281997	Asah2	N-acylsphingosine amidohydrolase 2
1426351_at	1.25	0.00720584	Hspd1	heat shock protein 1 (chaperonin)
1423828_at	1.24799	0.0437593	Fasn	fatty acid synthase
1437325_x_at	1.2468	0.00989786	Aldh18a1	aldehyde dehydrogenase 18 family, member A1
1458924_at	-1.2463	0.0260846	D430013B06Rik	RIKEN cDNA D430013B06 gene
1451054_at	1.24584	0.0447644	Orm1	orosomucoid 1
1421344_a_at	1.24583	0.0157081	Jub	ajuba
1433658_x_at	1.24542	0.0112685	Pcbp4	poly(rC) binding protein 4
1416622_at	1.24489	0.0114207	Wbscr16	Williams-Beuren syndrome chromosome region 16 homolog (human)
1435842_at	-1.2448	0.0475413	Nat8l	N-acetyltransferase 8-like
1416015_s_at	1.24452	0.00790851	Abce1	ATP-binding cassette, sub-family E (OABP), member 1
1453129_a_at	1.24372	0.0236466	Rgs12	regulator of G-protein signaling 12
1454733_at	-1.24367	0.0404836	Nod1	nucleotide-binding oligomerization domain containing 1
1424465_at	1.24324	0.0106883	Ccdc58	coiled-coil domain containing 58
1424087_at	1.24309	0.0229427	Psmg3	proteasome (prosome, macropain) assembly chaperone 3
1431931_a_at	1.24297	0.0232136	Rabl2	RAB, member of RAS oncogene family-like 2
1448542_at	1.24212	0.00358765	Bccip	BRCA2 and CDKN1A interacting protein
1453706_at	-1.24179	0.00706866	2900042A17Rik	RIKEN cDNA 2900042A17 gene
1460651_at	1.24136	0.00610156	Lat	linker for activation of T cells
1439266_a_at	1.24092	0.00561688	Polr3k	polymerase (RNA) III (DNA directed) polypeptide K
1433184_at	1.24089	0.0119299	6720477C19Rik	RIKEN cDNA 6720477C19 gene
1431233_at	-1.23903	0.0318266	Cnnm4	cyclin M4
1417930_at	1.239	0.0249545	Nab2	Ngfi-A binding protein 2
1457809_at	-1.23839	0.00436345	Kat2b	K(lysine) acetyltransferase 2B
1423212_at	1.23806	0.00561017	Phc1	polyhomeotic-like 1 (Drosophila)
1442897_at	-1.238	0.0183624	Fam13b	family with sequence similarity 13, member B
1450992_a_at	1.23698	0.00592069	Meis1	Meis homeobox 1
1448809_at	1.23686	0.00894961	Cse1l	chromosome segregation 1-like (S. cerevisiae)
1453725_a_at	1.23653	0.0378306	Mrps7	mitchondrial ribosomal protein S7
1422431_at	1.23642	0.0145476	Magee1	melanoma antigen, family E, 1
1424683_at	-1.23467	0.03299	Fam134b	family with sequence similarity 134, member B
1424300_at	1.23386	0.00916973	Gemin6	gem (nuclear organelle) associated protein 6
1428351_at	-1.23375	0.0457538	Ppm1m	protein phosphatase 1M
1438992_x_at	-1.23363	0.0264799	Atf4	activating transcription factor 4
1429054_at	1.2336	0.0221935	Mrpl47	mitochondrial ribosomal protein L47
1437163_x_at	1.2333	0.0197799	Gtf2h4	general transcription factor II H, polypeptide 4
1419734_at	1.23324	0.00610156	Actb	actin, beta
1424434_at	1.23311	0.0396846	Mettl22	methyltransferase like 22
1443856_at	1.23275	0.00638012	Rabep1	rabaptin, RAB GTPase binding effector protein 1
1418885_a_at	1.23192	0.00426728	Idh3b	isocitrate dehydrogenase 3 (NAD+) beta
1421287_a_at	-1.23164	0.0105448	Pecam1	platelet/endothelial cell adhesion molecule 1
1434084_at	1.23146	0.00469421	Zfp266	zinc finger protein 266
1416541_at	1.23142	0.00746786	Clpb	ClpB caseinolytic peptidase B homolog (E. coli)
1456439_x_at	-1.23079	0.030629	Mical1	microtubule associated monoxygenase, calponin and LIM domain containing 1
1441976_at	-1.23006	0.0209639	5430434G16Rik	RIKEN cDNA 5430434G16 gene
1426369_at	-1.22884	0.011255	Far1	fatty acyl CoA reductase 1
1423220_at	1.22878	0.00338457	Eif4e	eukaryotic translation initiation factor 4E
1418217_at	1.22862	0.0119522	Nme7	non-metastatic cells 7, protein expressed in (nucleoside-diphosphate kinase)
1442461_at	-1.2278	0.0173864	Gfod1	glucose-fructose oxidoreductase domain containing 1
1451377_a_at	1.22744	0.0307626	Aaas	achalasia, adrenocortical insufficiency, alacrimia
1454921_at	1.2258	0.0234094	Gm561	predicted gene 561
1452310_at	1.22571	0.0214054	Tada2a	transcriptional adaptor 2A
1450971_at	-1.22479	0.00838222	Gadd45b	growth arrest and DNA-damage-inducible 45 beta
1436102_at	-1.22413	0.00336787	Sec22c	SEC22 vesicle trafficking protein homolog C (S. cerevisiae)
1417295_at	1.22412	0.00923194	Mta1	metastasis associated 1
1428458_at	1.224	0.00393501	Pop1	processing of precursor 1, ribonuclease P/MRP family, (S. cerevisiae)
1427324_at	1.22352	0.00511766	Tmem120b	transmembrane protein 120B
1424308_at	-1.22288	0.00759743	Slc24a3	solute carrier family 24 (sodium/potassium/calcium exchanger), member 3
1452192_at	1.22263	0.0307465	Naf1	nuclear assembly factor 1 homolog (S. cerevisiae)
1442531_at	-1.22258	0.0132639	D12Ertd123e	DNA segment, Chr 12, ERATO Doi 123, expressed
1430037_at	-1.22254	0.0102109	Snx27	sorting nexin family member 27
1435401_at	1.22233	0.038285	Ttc26	tetratricopeptide repeat domain 26
1421800_at	-1.22226	0.00300761	Phxr1	per-hexamer repeat gene 1
1459917_at	-1.22211	0.0191002	Ggnbp2	gametogenetin binding protein 2
1420719_at	-1.22128	0.00969259	Tex15	testis expressed gene 15
1430292_a_at	1.22091	0.0376216	1810030N24Rik	RIKEN cDNA 1810030N24 gene
1425143_a_at	1.22086	0.00428582	Ndufs1	NADH dehydrogenase (ubiquinone) Fe-S protein 1
1419518_at	-1.22065	0.0155081	Tuba8	tubulin, alpha 8
1423430_at	1.21984	0.0329798	Mybbp1a	MYB binding protein (P160) 1a
1446614_at	-1.21968	0.0383188	Dgkz	diacylglycerol kinase zeta
1438307_at	-1.21963	0.00763282	Hmgb2	high mobility group box 2
1448627_s_at	1.21963	0.00284476	Pbk	PDZ binding kinase
1449404_at	1.21877	0.00680717	Pip4k2a	phosphatidylinositol-5-phosphate 4-kinase, type II, alpha
1422557_s_at	1.21843	0.0329798	Mt1	metallothionein 1
1434792_at	1.21839	0.0163627	2010320M18Rik	RIKEN cDNA 2010320M18 gene
1434239_at	1.21768	0.0372248	Rrp12	ribosomal RNA processing 12 homolog (S. cerevisiae)
1423662_at	-1.21742	0.0117535	Atp6ap2	ATPase, H+ transporting, lysosomal accessory protein 2
1456208_at	-1.21739	0.00436345	Gpat2	glycerol-3-phosphate acyltransferase 2, mitochondrial
1429191_at	1.21734	0.00534612	Dhx33	DEAH (Asp-Glu-Ala-His) box polypeptide 33
1424227_at	1.21582	0.00186069	Polr3h	polymerase (RNA) III (DNA directed) polypeptide H
1432673_at	-1.21567	0.00462794	2300010F08Rik	RIKEN cDNA 2300010F08 gene
1451077_at	1.21551	0.0170262	Rpl5	ribosomal protein L5
1435013_at	1.21547	0.00812067	Heatr2	HEAT repeat containing 2
1454888_at	1.21517	0.00830752	Pfdn4	prefoldin 4
1433169_at	-1.21394	0.0442487	5830456J23Rik	RIKEN cDNA 5830456J23 gene
1421623_at	1.21371	0.00706866	Il12rb2	interleukin 12 receptor, beta 2
1456896_at	-1.21362	0.00436574	6720462K09Rik	RIKEN cDNA 6720462K09 gene
1417683_at	1.21358	0.00262722	Diablo	diablo homolog (Drosophila)
1449623_at	1.21352	0.00436345	Txnrd3	thioredoxin reductase 3
1437520_a_at	1.21351	0.0138162	Nup85	nucleoporin 85
1455545_at	1.21304	0.00980344	1110065P20Rik	RIKEN cDNA 1110065P20 gene
1451504_at	1.21241	0.0225995	Chchd3	coiled-coil-helix-coiled-coil-helix domain containing 3
1436725_at	-1.21218	0.0233105	E130306D19Rik	RIKEN cDNA E130306D19 gene
1451141_at	1.21215	0.0283587	Mettl8	methyltransferase like 8
1416395_at	1.21181	0.0140217	Guk1	guanylate kinase 1
1423737_at	1.21072	0.00592069	Ndufs3	NADH dehydrogenase (ubiquinone) Fe-S protein 3
1452678_a_at	1.21048	0.00262722	Ccbl1	cysteine conjugate-beta lyase 1
1428775_at	1.20999	0.00348514	1110008L16Rik	RIKEN cDNA 1110008L16 gene
1453244_at	-1.20964	0.0476052	5830416P10Rik	RIKEN cDNA 5830416P10 gene
1457265_at	1.20927	0.0231274	Akap17b	A kinase (PRKA) anchor protein 17B
1435249_at	1.20848	0.00511766	Btaf1	BTAF1 RNA polymerase II, B-TFIID transcription factor-associated, (Mot1 homolog, S. cerevisiae)
1446225_at	-1.20817	0.0493509	Ssu72	Ssu72 RNA polymerase II CTD phosphatase homolog (yeast)
1441668_at	-1.20809	0.0173755	E130107B13Rik	RIKEN cDNA E130107B13 gene
1438676_at	-1.20791	0.0185538	Gbp6	guanylate binding protein 6
1460198_a_at	1.20778	0.00971159	Psmb3	proteasome (prosome, macropain) subunit, beta type 3
1426264_at	1.20756	0.014799	Dlat	dihydrolipoamide S-acetyltransferase (E2 component of pyruvate dehydrogenase complex)
1443905_at	-1.20682	0.0101466	Hpvc-ps	human papillomavirus 18 E5 central sequence motif, pseudogene
1417658_at	1.20597	0.00457875	Tbrg4	transforming growth factor beta regulated gene 4
1446673_at	-1.20577	0.0488647	D330013E07Rik	RIKEN cDNA D330013E07 gene
1426231_at	1.20568	0.00436345	Vit	vitrin
1421456_at	1.20506	0.00653873	P2ry1	purinergic receptor P2Y, G-protein coupled 1
1435530_at	1.20446	0.00741449	Camsap1	calmodulin regulated spectrin-associated protein 1
1442096_at	1.20363	0.00177721	Lrrc66	leucine rich repeat containing 66
1451232_at	1.2031	0.0141958	Cd151	CD151 antigen
1451334_at	1.20212	0.0195498	Fam58b	family with sequence similarity 58, member B
1458295_at	1.20148	0.00659481	BC038331	cDNA sequence BC038331
1451097_at	-1.20136	0.0263076	Vasp	vasodilator-stimulated phosphoprotein
1428810_at	1.20127	0.015002	2700097O09Rik	RIKEN cDNA 2700097O09 gene
1435529_at	-1.20122	0.0209062	Gm14446	predicted gene 14446
1455505_at	1.20044	0.00741449	Gatad2a	GATA zinc finger domain containing 2A
1416259_at	1.20042	0.0330107	Pex12	peroxisomal biogenesis factor 12
1416521_at	1.20041	0.00497414	Sepw1	selenoprotein W, muscle 1
1452839_at	1.2003	0.0315858	Dph5	DPH5 homolog (S. cerevisiae)
1450339_a_at	1.19995	0.00949266	Bcl11b	B cell leukemia/lymphoma 11B
1421884_at	1.19974	0.00384425	Sos1	son of sevenless homolog 1 (Drosophila)
1430500_s_at	1.19966	0.00456461	Mtx2	metaxin 2
1453285_at	-1.19938	0.0150811	Tmem88	transmembrane protein 88
1424395_at	1.19899	0.00426565	Asrgl1	asparaginase like 1
1434291_a_at	1.19883	0.0112259	Serf1	small EDRK-rich factor 1
1436352_at	1.19867	0.00479349	Cep78	centrosomal protein 78
1419495_at	1.19824	0.0384407	Immp2l	IMP2 inner mitochondrial membrane peptidase-like (S. cerevisiae)
1451884_a_at	1.19782	0.00706866	Lsm2	LSM2 homolog, U6 small nuclear RNA associated (S. cerevisiae)
1424192_at	1.1976	0.0223452	1500011H22Rik	RIKEN cDNA 1500011H22 gene
1417707_at	-1.19758	0.0359544	N4bp2l1	NEDD4 binding protein 2-like 1
1431372_at	-1.19711	0.022658	Srpk2	serine/arginine-rich protein specific kinase 2
1416936_at	-1.19689	0.0115374	Aatk	apoptosis-associated tyrosine kinase
1419081_at	1.19609	0.00657594	Atg10	autophagy-related 10 (yeast)
1415936_at	-1.19549	0.0253464	Bcar3	breast cancer anti-estrogen resistance 3
1416737_at	-1.1953	0.0265407	Gys1	glycogen synthase 1, muscle
1448746_at	1.19521	0.0347455	Nbn	nibrin
1417408_at	1.19515	0.0424094	F3	coagulation factor III
1418392_a_at	-1.19496	0.0200544	Gbp3	guanylate binding protein 3
1438824_at	-1.19481	0.0267297	Slc20a1	solute carrier family 20, member 1
1418171_at	1.19474	0.0119	Tceal8	transcription elongation factor A (SII)-like 8
1425331_at	1.19388	0.0088254	Zfp106	zinc finger protein 106
1429859_a_at	1.19318	0.00930182	Arl2bp	ADP-ribosylation factor-like 2 binding protein
1431554_a_at	1.19315	0.013445	Anxa9	annexin A9
1417437_at	1.19309	0.0314753	Xrcc6	X-ray repair complementing defective repair in Chinese hamster cells 6
1436000_a_at	1.19307	0.00990597	Skp2	S-phase kinase-associated protein 2 (p45)
1459897_a_at	-1.1928	0.0187929	Sbsn	suprabasin
1418010_a_at	1.19249	0.00374402	Sh3glb1	SH3-domain GRB2-like B1 (endophilin)
1429493_at	1.19212	0.00561017	Mettl4	methyltransferase like 4
1451545_at	1.19104	0.0272284	Tdrd3	tudor domain containing 3
1416127_a_at	1.19084	0.0286441	Dnpep	aspartyl aminopeptidase
1434116_at	1.19077	0.00508179	Cbx2	chromobox homolog 2 (Drosophila Pc class)
1460348_at	1.19052	0.0152515	Mad2l2	MAD2 mitotic arrest deficient-like 2 (yeast)
1457374_at	-1.19047	0.0157539	Nedd4l	neural precursor cell expressed, developmentally down-regulated gene 4-like
1416020_a_at	1.19022	0.0354551	Atp5g1	ATP synthase, H+ transporting, mitochondrial F0 complex, subunit c1 (subunit 9)
1451931_x_at	-1.18987	0.00528164	H2-L	histocompatibility 2, D region locus L
1418076_at	-1.18945	0.0106345	St14	suppression of tumorigenicity 14 (colon carcinoma)
1428754_at	1.18925	0.00458105	Trmt6	tRNA methyltransferase 6 homolog (S. cerevisiae)
1437234_x_at	1.18913	0.0128733	Prmt2	protein arginine N-methyltransferase 2
1430482_at	-1.18904	0.0385154	Adora3	adenosine A3 receptor
1460323_at	1.18851	0.0154696	Tars	threonyl-tRNA synthetase
1454919_at	1.18838	0.0106457	Nmt2	N-myristoyltransferase 2
1420113_s_at	1.18835	0.0151615	2410022L05Rik	RIKEN cDNA 2410022L05 gene
1434605_at	1.1877	0.00601145	Eif5b	eukaryotic translation initiation factor 5B
1428510_at	1.18741	0.0183577	Lphn1	latrophilin 1
1448462_at	1.18732	0.00746786	Tdg	thymine DNA glycosylase
1448679_at	1.18667	0.00479349	Hyal2	hyaluronoglucosaminidase 2
1434900_at	-1.18614	0.0401522	Mkl1	MKL (megakaryoblastic leukemia)/myocardin-like 1
1431339_a_at	-1.18582	0.0304209	Efhd2	EF hand domain containing 2
1440633_at	-1.18548	0.0219727	Neil3	nei like 3 (E. coli)
1453354_at	-1.18505	0.00436574	Gm11602	predicted gene 11602
1448474_at	-1.18418	0.00592069	Nek7	NIMA (never in mitosis gene a)-related expressed kinase 7
1419583_at	-1.18404	0.00653873	Cbx4	chromobox homolog 4 (Drosophila Pc class)
1435136_at	-1.18346	0.0165831	Whsc1	Wolf-Hirschhorn syndrome candidate 1 (human)
1448770_a_at	1.18213	0.00168953	Atpif1	ATPase inhibitory factor 1
1424382_at	1.18191	0.0447644	Rcn3	reticulocalbin 3, EF-hand calcium binding domain
1448328_at	-1.18188	0.0284755	Sh3bp2	SH3-domain binding protein 2
1420367_at	1.18184	0.00707689	Denr	density-regulated protein
1424406_at	1.18133	0.0184725	Bcl2l13	BCL2-like 13 (apoptosis facilitator)
1425400_a_at	1.18108	0.0434999	Cited4	Cbp/p300-interacting transactivator, with Glu/Asp-rich carboxy-terminal domain, 4
1449886_a_at	1.18087	0.0230373	Timm9	translocase of inner mitochondrial membrane 9 homolog (yeast)
1452400_a_at	1.18007	0.0189673	Hoxa11as	HOXA11 antisense RNA (non-protein coding)
1417174_at	1.17998	0.00923657	Tmem218	transmembrane protein 218
1435410_at	1.17991	0.0108408	Tcam1	testicular cell adhesion molecule 1
1440573_at	-1.17976	0.0238257	Gm2590	predicted gene 2590
1447271_at	-1.17948	0.0217676	Nck1	non-catalytic region of tyrosine kinase adaptor protein 1
1436538_at	1.17935	0.0216133	Ankrd37	ankyrin repeat domain 37
1453821_at	1.17902	0.00923927	N6amt1	N-6 adenine-specific DNA methyltransferase 1 (putative)
1451257_at	1.179	0.0492015	Acsl6	acyl-CoA synthetase long-chain family member 6
1435133_at	1.17848	0.00459879	Ugcg	UDP-glucose ceramide glucosyltransferase
1419585_at	-1.17834	0.0132211	Rp2h	retinitis pigmentosa 2 homolog (human)
1442143_at	-1.17824	0.025774	Ano4	anoctamin 4
1456597_at	1.17723	0.00741449	Heatr3	HEAT repeat containing 3
1455007_s_at	1.17711	0.0157815	Gpt2	glutamic pyruvate transaminase (alanine aminotransferase) 2
1455988_a_at	1.17682	0.00475829	Cct6a	chaperonin containing Tcp1, subunit 6a (zeta)
1419743_s_at	1.17682	0.00593151	Carm1	coactivator-associated arginine methyltransferase 1
1442731_at	-1.17604	0.0113743	Pds5a	PDS5, regulator of cohesion maintenance, homolog A (S. cerevisiae)
1428542_at	1.17482	0.0131665	Eif1ad	eukaryotic translation initiation factor 1A domain containing
1449469_at	1.17481	0.0201124	Pkd2l2	polycystic kidney disease 2-like 2
1451229_at	1.17441	0.022852	Hdac11	histone deacetylase 11
1450630_at	1.1732	0.0142993	Qtrt1	queuine tRNA-ribosyltransferase 1
1437039_at	1.17283	0.00372149	Cops2	COP9 (constitutive photomorphogenic) homolog, subunit 2 (Arabidopsis thaliana)
1440771_at	-1.17281	0.0308968	Zkscan1	zinc finger with KRAB and SCAN domains 1
1438417_at	-1.17269	0.013087	Pwwp2b	PWWP domain containing 2B
1419316_s_at	1.17266	0.0499147	Gnb1l	guanine nucleotide binding protein (G protein), beta polypeptide 1-like
1433547_s_at	1.17263	0.0214631	Nudcd1	NudC domain containing 1
1440890_a_at	1.17223	0.0117244	Zfp809	zinc finger protein 809
1416479_a_at	1.17197	0.0151182	Tmem14c	transmembrane protein 14C
1456577_x_at	1.17105	0.0446852	Pitrm1	pitrilysin metallepetidase 1
1418305_s_at	1.16995	0.0139649	Gar1	GAR1 ribonucleoprotein homolog (yeast)
1415690_at	1.16979	0.0294803	Mrpl27	mitochondrial ribosomal protein L27
1442824_at	-1.16968	0.00974171	8030497I03Rik	RIKEN cDNA 8030497I03 gene
1418322_at	1.16956	0.00370404	Crem	cAMP responsive element modulator
1424293_s_at	1.16935	0.00415099	Tmem55a	transmembrane protein 55A
1417726_at	1.1688	0.0177284	Sssca1	Sjogren's syndrome/scleroderma autoantigen 1 homolog (human)
1426533_at	1.1687	0.00971159	Nop56	NOP56 ribonucleoprotein homolog (yeast)
1433942_at	1.16856	0.00754414	Myo6	myosin VI
1441573_at	-1.16812	0.019172	Scmh1	sex comb on midleg homolog 1
1422318_at	-1.16804	0.0204103	Foxd4	forkhead box D4
1429824_at	1.16799	0.0029652	4930550C14Rik	RIKEN cDNA 4930550C14 gene
1453239_a_at	-1.16756	0.0336863	Ankrd22	ankyrin repeat domain 22
1417661_at	-1.16734	0.0175905	Rdm1	RAD52 motif 1
1438652_x_at	1.16639	0.0130094	Pigq	phosphatidylinositol glycan anchor biosynthesis, class Q
1450397_at	1.16612	0.0123747	Mtap1b	microtubule-associated protein 1B
1457878_at	1.16566	0.00637441	C430042M11Rik	RIKEN cDNA C430042M11 gene
1416915_at	1.16549	0.00314611	Msh6	mutS homolog 6 (E. coli)
1431388_at	-1.1654	0.0042582	Mphosph10	M-phase phosphoprotein 10 (U3 small nucleolar ribonucleoprotein)
1442931_at	-1.16531	0.00370404	Gm15652	predicted gene 15652
1424407_s_at	1.16518	0.0280298	Cbx6	chromobox homolog 6
1433705_at	1.16486	0.0184725	Zfp213	zinc finger protein 213
1435514_at	1.16452	0.0284279	Lztfl1	leucine zipper transcription factor-like 1
1426118_a_at	1.1645	0.0223914	Tomm40	translocase of outer mitochondrial membrane 40 homolog (yeast)
1429174_at	1.16418	0.0121205	Wdr34	WD repeat domain 34
1440604_at	-1.16373	0.00587502	8030494B02Rik	Riken cDNA 8030494B02 gene
1423461_a_at	-1.16318	0.0282596	Ubl3	ubiquitin-like 3
1455184_at	1.16309	0.00305869	Mob1b	MOB kinase activator 1B
1454614_at	1.1628	0.0123111	1810013D10Rik	RIKEN cDNA 1810013D10 gene
1439393_x_at	1.16271	0.00331467	Ppp2r4	protein phosphatase 2A, regulatory subunit B (PR 53)
1428389_s_at	1.1623	0.012411	Wdr43	WD repeat domain 43
1451552_at	1.16199	0.00504135	Lipt1	lipoyltransferase 1
1457024_x_at	1.1619	0.00812067	Slc35a2	solute carrier family 35 (UDP-galactose transporter), member A2
1420915_at	-1.16141	0.00490288	Stat1	signal transducer and activator of transcription 1
1460378_a_at	-1.16125	0.0248479	Tes	testis derived transcript
1436311_at	1.16114	0.0113071	Gemin5	gem (nuclear organelle) associated protein 5
1429963_at	-1.16097	0.00479349	Mapk6	mitogen-activated protein kinase 6
1444400_at	-1.16071	0.0403656	Rb1	retinoblastoma 1
1422456_at	1.16023	0.00732382	Nsf	N-ethylmaleimide sensitive fusion protein
1415725_at	1.16005	0.00952713	Rrn3	RRN3 RNA polymerase I transcription factor homolog (yeast)
1441355_at	-1.15913	0.0178569	E030047P09Rik	RIKEN cDNA E030047P09 gene
1416792_at	1.15877	0.00237513	Ppm1g	protein phosphatase 1G (formerly 2C), magnesium-dependent, gamma isoform
1441660_at	-1.15849	0.00725867	Actr2	ARP2 actin-related protein 2 homolog (yeast)
1446783_at	-1.15816	0.0424066	Gadd45gip1	growth arrest and DNA-damage-inducible, gamma interacting protein 1
1416606_s_at	1.15798	0.0268701	Nhp2	NHP2 ribonucleoprotein homolog (yeast)
1435445_at	1.1575	0.0121068	Ccnt2	cyclin T2
1437485_at	-1.15718	0.00389298	Nos1ap	nitric oxide synthase 1 (neuronal) adaptor protein
1428353_at	1.15647	0.00643429	Foxk2	forkhead box K2
1429562_at	-1.15645	0.00241595	Sp110	Sp110 nuclear body protein
1421219_at	-1.15543	0.0110073	Ttll3	tubulin tyrosine ligase-like family, member 3
1417096_at	1.15541	0.0375934	Rrp15	ribosomal RNA processing 15 homolog (S. cerevisiae)
1437067_at	1.15526	0.0253352	Phtf2	putative homeodomain transcription factor 2
1427146_at	-1.155	0.0091927	Carns1	carnosine synthase 1
1448610_a_at	1.15498	0.00854317	Sod2	superoxide dismutase 2, mitochondrial
1452154_at	1.15479	0.0239075	Iars	isoleucine-tRNA synthetase
1429604_at	-1.15462	0.0230373	1810011H11Rik	RIKEN cDNA 1810011H11 gene
1439788_at	1.15408	0.0127138	Ccdc111	coiled-coil domain containing 111
1439696_at	-1.15368	0.0407827	Nr2c2	nuclear receptor subfamily 2, group C, member 2
1444811_at	-1.15297	0.0463055	Sec62	SEC62 homolog (S. cerevisiae)
1423511_at	1.15241	0.00475829	Asf1a	ASF1 anti-silencing function 1 homolog A (S. cerevisiae)
1419213_at	1.15204	0.00899303	Nat6	N-acetyltransferase 6
1455163_at	1.15183	0.00423629	Guf1	GUF1 GTPase homolog (S. cerevisiae)
1459185_at	-1.1515	0.0194456	Npat	nuclear protein in the AT region
1434398_at	1.15125	0.0221124	Nkrf	NF-kappaB repressing factor
1421059_a_at	1.15061	0.00215292	Alg2	asparagine-linked glycosylation 2 homolog (yeast, alpha-1,3-mannosyltransferase)
1457161_at	-1.15022	0.0158431	9530029O12Rik	RIKEN cDNA 9530029O12 gene
1435671_at	1.14986	0.0110909	Mipol1	mirror-image polydactyly gene 1 homolog (human)
1460713_at	1.1495	0.0113743	BC048355	cDNA sequence BC048355
1416005_at	1.14932	0.00469421	Psmc1	protease (prosome, macropain) 26S subunit, ATPase 1
1442982_at	1.14928	0.0120228	Ccdc66	coiled-coil domain containing 66
1448727_at	1.14925	0.0205498	Tle6	transducin-like enhancer of split 6, homolog of Drosophila E(spl)
1440254_at	1.14865	0.034951	Snord104	small nucleolar RNA, C/D box 104
1443641_at	-1.14854	0.0061873	Fermt3	fermitin family homolog 3 (Drosophila)
1423393_at	1.14741	0.0121507	Clic4	chloride intracellular channel 4 (mitochondrial)
1460559_at	1.1473	0.0106457	Kank2	KN motif and ankyrin repeat domains 2
1417454_at	1.14627	0.00428564	Cul4b	cullin 4B
1418293_at	-1.14601	0.0240232	Ifit2	interferon-induced protein with tetratricopeptide repeats 2
1436585_at	1.14488	0.00355714	BB182297	expressed sequence BB182297
1422754_at	1.14482	0.00264472	Tmod1	tropomodulin 1
1425012_at	-1.14472	0.007836	Gng5	guanine nucleotide binding protein (G protein), gamma 5
1432562_at	1.14449	0.0440202	1110006G14Rik	RIKEN cDNA 1110006G14 gene
1435660_at	-1.14448	0.0410539	LOC664787	Sp110 nuclear body protein-like
1415985_at	1.14441	0.00384425	Sf3b3	splicing factor 3b, subunit 3
1416886_at	1.1441	0.0205481	C1d	C1D nuclear receptor co-repressor
1417209_at	-1.14387	0.026106	Sertad2	SERTA domain containing 2
1427198_at	-1.14383	0.0232698	BC022960	cDNA sequence BC022960
1422308_a_at	1.14381	0.00611995	Lgals7	lectin, galactose binding, soluble 7
1441195_at	-1.14276	0.00643429	6030487A22Rik	RIKEN cDNA 6030487A22 gene
1428080_at	1.14231	0.00756968	Pgam5	phosphoglycerate mutase family member 5
1439441_x_at	-1.14216	0.0136264	Lats2	large tumor suppressor 2
1434634_at	1.1417	0.0242674	Gm166	predicted gene 166
1448774_at	1.14127	0.00876431	Stoml2	stomatin (Epb7.2)-like 2
1452199_at	1.14117	0.00458105	Tmem209	transmembrane protein 209
1452850_s_at	1.14087	0.0156994	Brms1l	breast cancer metastasis-suppressor 1-like
1440226_at	1.1406	0.0305665	Zfp760	zinc finger protein 760
1435138_at	-1.13966	0.0145146	Fam155a	family with sequence similarity 155, member A
1422732_at	1.13958	0.0167336	Poldip2	polymerase (DNA-directed), delta interacting protein 2
1419127_at	1.13895	0.0030964	Npy	neuropeptide Y
1454873_at	1.13891	0.00526384	Zfp775	zinc finger protein 775
1438890_at	-1.13839	0.00265613	Kdm2a	lysine (K)-specific demethylase 2A
1452266_at	1.13819	0.0256831	Las1l	LAS1-like (S. cerevisiae)
1448650_a_at	1.13744	0.0136894	Pole	polymerase (DNA directed), epsilon
1415830_at	1.13668	0.0110862	Orc5	origin recognition complex, subunit 5
1423823_at	1.13634	0.00593151	Mrto4	MRT4, mRNA turnover 4, homolog (S. cerevisiae)
1458489_at	-1.1361	0.0449806	Gm19729	predicted gene, 19729
1450700_at	-1.13551	0.00259488	Cdc42ep3	CDC42 effector protein (Rho GTPase binding) 3
1430982_at	1.13496	0.011412	Srsf1	serine/arginine-rich splicing factor 1
1423234_at	1.13457	0.0161439	Psmd5	proteasome (prosome, macropain) 26S subunit, non-ATPase, 5
1416563_at	1.13348	0.0105289	Ctps	cytidine 5'-triphosphate synthase
1416174_at	1.13338	0.0128038	Rbbp9	retinoblastoma binding protein 9
1449864_at	-1.13334	0.0189927	Il4	interleukin 4
1436913_at	-1.13331	0.0238697	Cdc14a	CDC14 cell division cycle 14 homolog A (S. cerevisiae)
1449450_at	-1.13314	0.0360545	Ptges	prostaglandin E synthase
1430058_at	-1.133	0.0260937	Slbp	stem-loop binding protein
1445106_at	-1.13279	0.0236466	Gm19816	predicted gene, 19816
1437334_x_at	1.13214	0.0305422	Parn	poly(A)-specific ribonuclease (deadenylation nuclease)
1416373_at	1.13193	0.00815373	Nfs1	nitrogen fixation gene 1 (S. cerevisiae)
1420095_s_at	1.13176	0.00479349	Zscan21	zinc finger and SCAN domain containing 21
1445337_at	-1.13137	0.0268803	Dnajc13	DnaJ (Hsp40) homolog, subfamily C, member 13
1417125_at	1.13069	0.0464839	Ahcy	S-adenosylhomocysteine hydrolase
1423219_a_at	1.13044	0.02364	Mrpl49	mitochondrial ribosomal protein L49
1454850_at	-1.13021	0.0204473	Tbc1d10c	TBC1 domain family, member 10c
1450028_a_at	1.12989	0.00477203	Lancl2	LanC (bacterial lantibiotic synthetase component C)-like 2
1422443_at	1.12964	0.00916973	Xpnpep1	X-prolyl aminopeptidase (aminopeptidase P) 1, soluble
1438878_at	-1.12929	0.00450875	6430537K16Rik	RIKEN cDNA 6430537K16 gene
1438334_at	-1.12862	0.00436574	Dock2	dedicator of cyto-kinesis 2
1416068_at	1.12849	0.0447991	Kars	lysyl-tRNA synthetase
1424541_at	1.12774	0.00860108	Tmem70	transmembrane protein 70
1455132_at	-1.12769	0.0274137	Rasal3	RAS protein activator like 3
1422767_at	1.12757	0.00975899	Bysl	bystin-like
1429137_at	1.12747	0.00716841	2810422O20Rik	RIKEN cDNA 2810422O20 gene
1451389_at	1.12732	0.0383472	Dnajc24	DnaJ (Hsp40) homolog, subfamily C, member 24
1435352_at	1.12729	0.0181542	Pigk	phosphatidylinositol glycan anchor biosynthesis, class K
1460370_at	1.12716	0.0163463	Top1mt	DNA topoisomerase 1, mitochondrial
1452166_a_at	1.12701	0.00483224	Krt10	keratin 10
1434348_at	1.12635	0.014012	Fez2	fasciculation and elongation protein zeta 2 (zygin II)
1453381_at	1.12633	0.0176407	Rsf1	remodeling and spacing factor 1
1422979_at	1.12615	0.00511766	Suv39h2	suppressor of variegation 3-9 homolog 2 (Drosophila)
1434063_at	1.12592	0.00625747	Zfp664	zinc finger protein 664
1420631_a_at	1.1258	0.00475829	Blcap	bladder cancer associated protein homolog (human)
1422482_at	1.12538	0.0131403	Ruvbl2	RuvB-like protein 2
1432181_s_at	1.12521	0.00536953	Sco2	SCO cytochrome oxidase deficient homolog 2 (yeast)
1415886_at	-1.12432	0.0268803	Sh2d3c	SH2 domain containing 3C
1417062_at	1.12385	0.0169866	Armc10	armadillo repeat containing 10
1424977_at	-1.12382	0.0359488	Ppp1r42	protein phosphatase 1, regulatory subunit 42
1442348_at	1.12285	0.0126034	Katnal1	katanin p60 subunit A-like 1
1452996_a_at	1.12208	0.0360502	Aven	apoptosis, caspase activation inhibitor
1418164_at	1.12142	0.00725037	Stx2	syntaxin 2
1418292_at	1.12115	0.00803815	Asna1	arsA arsenite transporter, ATP-binding, homolog 1 (bacterial)
1448126_at	1.11951	0.00690021	Fam60a	family with sequence similarity 60, member A
1434373_at	1.11939	0.0247445	Fam168a	family with sequence similarity 168, member A
1415733_a_at	1.11937	0.0155557	Tomm5	translocase of outer mitochondrial membrane 5 homolog (yeast)
1428400_at	1.11926	0.0278062	2200002K05Rik	RIKEN cDNA 2200002K05 gene
1441350_at	-1.11838	0.0214999	Fgf3	fibroblast growth factor 3
1424223_at	1.11827	0.0101523	Mtfp1	mitochondrial fission process 1
1453016_at	1.11815	0.0177507	Hspb11	heat shock protein family B (small), member 11
1426939_at	1.11794	0.0149866	Tsr2	TSR2, 20S rRNA accumulation, homolog (S. cerevisiae)
1428106_at	1.11774	0.0415813	1300001I01Rik	RIKEN cDNA 1300001I01 gene
1438774_s_at	1.11771	0.0106457	Pgm2l1	phosphoglucomutase 2-like 1
1426701_at	-1.11771	0.018681	Fam160a2	family with sequence similarity 160, member A2
1449508_at	1.1175	0.0436628	Il27ra	interleukin 27 receptor, alpha
1427011_a_at	1.11706	0.0113103	Lancl1	LanC (bacterial lantibiotic synthetase component C)-like 1
1448869_a_at	1.11679	0.0215389	Mrps16	mitochondrial ribosomal protein S16
1436351_at	1.11618	0.00780568	Coq3	coenzyme Q3 homolog, methyltransferase (yeast)
1456194_a_at	1.11565	0.00885756	Park7	Parkinson disease (autosomal recessive, early onset) 7
1454286_at	-1.11564	0.00503958	1110004M10Rik	RIKEN cDNA 1110004M10 gene
1423735_a_at	1.11552	0.0477004	Wdr36	WD repeat domain 36
1454878_at	1.11536	0.00561017	Dzip3	DAZ interacting protein 3, zinc finger
1428309_s_at	1.11449	0.0421342	Pdrg1	p53 and DNA damage regulated 1
1415754_at	1.11436	0.0289623	Polr2f	polymerase (RNA) II (DNA directed) polypeptide F
1452923_at	1.11431	0.0169029	Ndufaf2	NADH dehydrogenase (ubiquinone) 1 alpha subcomplex, assembly factor 2
1425050_at	1.11418	0.0482746	Isoc1	isochorismatase domain containing 1
1418842_at	-1.11358	0.020883	Hcls1	hematopoietic cell specific Lyn substrate 1
1417470_at	1.11353	0.00592069	Apobec3	apolipoprotein B mRNA editing enzyme, catalytic polypeptide 3
1415770_at	1.11251	0.00623312	Wdr6	WD repeat domain 6
1426564_at	1.11232	0.00916973	Zfp553	zinc finger protein 553
1419519_at	1.11212	0.00860632	Igf1	insulin-like growth factor 1
1454846_at	1.11107	0.00436345	Utp15	UTP15, U3 small nucleolar ribonucleoprotein, homolog (yeast)
1451784_x_at	-1.11107	0.00511753	H2-D1	histocompatibility 2, D region locus 1
1426844_a_at	1.11039	0.0205337	Pdcd2l	programmed cell death 2-like
1434221_at	1.10975	0.0182861	Mical3	microtubule associated monoxygenase, calponin and LIM domain containing 3
1441590_at	1.10971	0.0127761	Kcnj5	potassium inwardly-rectifying channel, subfamily J, member 5
1424001_at	1.10953	0.0457447	Mki67ip	Mki67 (FHA domain) interacting nucleolar phosphoprotein
1448909_a_at	1.10952	0.0115374	Mrpl39	mitochondrial ribosomal protein L39
1460696_at	-1.10952	0.00449765	BC026585	cDNA sequence BC026585
1419413_at	1.10935	0.0171409	Ccl17	chemokine (C-C motif) ligand 17
1420679_a_at	1.10925	0.0132916	Aig1	androgen-induced 1
1430940_at	-1.10809	0.00308296	3110045A19Rik	RIKEN cDNA 3110045A19 gene
1448710_at	-1.1074	0.0121507	Cxcr4	chemokine (C-X-C motif) receptor 4
1454924_at	1.10707	0.00504135	Fut10	fucosyltransferase 10
1436384_at	1.1066	0.00480699	Rps10	ribosomal protein S10
1436833_x_at	1.10658	0.0154349	Ttll1	tubulin tyrosine ligase-like 1
1459522_s_at	-1.10629	0.0435979	Gyg	glycogenin
1429065_at	1.10593	0.00711749	Ikbip	IKBKB interacting protein
1440817_x_at	1.10537	0.0440943	Zfp771	zinc finger protein 771
1451489_at	1.10495	0.00907414	Slc25a35	solute carrier family 25, member 35
1444992_at	-1.10464	0.0128038	AI120166	expressed sequence AI120166
1448633_at	1.10441	0.00720584	Prpf31	PRP31 pre-mRNA processing factor 31 homolog (yeast)
1428129_at	1.10441	0.0267297	Lman1	lectin, mannose-binding, 1
1434988_x_at	-1.10396	0.0039297	Aldh2	aldehyde dehydrogenase 2, mitochondrial
1457656_s_at	-1.10373	0.0131403	C230085N15Rik	RIKEN cDNA C230085N15 gene
1457102_at	1.10308	0.0440968	A030001D16Rik	RIKEN cDNA A030001D16 gene
1457639_at	-1.10295	0.0118338	Atp6v1h	ATPase, H+ transporting, lysosomal V1 subunit H
1431688_at	-1.10272	0.00415099	LOC73899	uncharacterized LOC73899
1418040_at	1.10269	0.00607066	Tmem186	transmembrane protein 186
1434069_at	-1.10084	0.00741449	Prex1	phosphatidylinositol-3,4,5-trisphosphate-dependent Rac exchange factor 1
1455197_at	-1.10047	0.00839255	Rnd1	Rho family GTPase 1
1453300_at	-1.09983	0.00694359	Slc35d2	solute carrier family 35, member D2
1429096_at	1.09942	0.00732382	2810455D13Rik	RIKEN cDNA 2810455D13 gene
1448154_at	1.09932	0.0310822	Ndrg2	N-myc downstream regulated gene 2
1433477_at	-1.09927	0.0108381	Abr	active BCR-related gene
1416147_at	1.09884	0.0107287	Hspa4	heat shock protein 4
1457700_at	1.09879	0.0123747	Cyp4f39	cytochrome P450, family 4, subfamily f, polypeptide 39
1423134_at	-1.09859	0.020883	Rilpl2	Rab interacting lysosomal protein-like 2
1418202_a_at	1.09854	0.00529098	Wiz	widely-interspaced zinc finger motifs
1439773_at	1.09849	0.0295647	Ly6e	lymphocyte antigen 6 complex, locus E
1433174_a_at	1.09844	0.00764221	5430440L12Rik	RIKEN cDNA 5430440L12 gene
1456662_at	-1.0984	0.00420085	AA386476	expressed sequence AA386476
1426316_at	1.09782	0.0419564	6330416G13Rik	RIKEN cDNA 6330416G13 gene
1434088_at	1.09735	0.043517	Zkscan17	zinc finger with KRAB and SCAN domains 17
1418321_at	1.09711	0.040238	Eci1	enoyl-Coenzyme A delta isomerase 1
1432052_at	1.09668	0.0170129	Exosc1	exosome component 1
1424889_at	1.09659	0.00592069	Nupl2	nucleoporin like 2
1440120_at	1.09656	0.00449444	Gnb2l1	guanine nucleotide binding protein (G protein), beta polypeptide 2 like 1
1424312_at	-1.09623	0.0156994	Adipor1	adiponectin receptor 1
1439580_at	-1.09576	0.0101466	B930053N05Rik	RIKEN cDNA B930053N05 gene
1458811_at	-1.09576	0.0103793	9430047L24Rik	RIKEN cDNA 9430047L24 gene
1428447_at	1.09572	0.0232536	Tmem14a	transmembrane protein 14A
1437121_at	-1.09523	0.0197666	Dennd1c	DENN/MADD domain containing 1C
1452661_at	1.09517	0.0357754	Tfrc	transferrin receptor
1456116_at	-1.09509	0.0474673	Ctnnd2	catenin (cadherin associated protein), delta 2
1435275_at	1.09442	0.0468125	Cox6b2	cytochrome c oxidase subunit VIb polypeptide 2
1456846_at	-1.09405	0.0345455	Zbtb42	zinc finger and BTB domain containing 42
1418773_at	1.09393	0.0308201	Fads3	fatty acid desaturase 3
1443750_s_at	1.09388	0.0126034	Rpp40	ribonuclease P 40 subunit (human)
1424858_at	1.09349	0.0165314	L2hgdh	L-2-hydroxyglutarate dehydrogenase
1457065_at	1.09338	0.0158701	Upk1b	uroplakin 1B
1434258_s_at	1.09317	0.00560007	Phactr4	phosphatase and actin regulator 4
1449799_s_at	1.09284	0.0459617	Pkp2	plakophilin 2
1455750_at	1.0926	0.0115423	Ralgapa2	Ral GTPase activating protein, alpha subunit 2 (catalytic)
1443827_x_at	-1.09211	0.0331443	Fam20c	family with sequence similarity 20, member C
1424232_a_at	1.09181	0.00709541	Ftsjd1	FtsJ methyltransferase domain containing 1
1427552_a_at	1.09165	0.0262429	Gstz1	glutathione transferase zeta 1 (maleylacetoacetate isomerase)
1448651_at	1.09129	0.00996666	Nudt5	nudix (nucleoside diphosphate linked moiety X)-type motif 5
1416767_a_at	-1.09123	0.0199239	1110003E01Rik	RIKEN cDNA 1110003E01 gene
1423700_at	1.0908	0.0124154	Rfc3	replication factor C (activator 1) 3
1424243_at	1.09047	0.00423629	Rwdd4a	RWD domain containing 4A
1456616_a_at	1.09029	0.0217922	Bsg	basigin
1436856_x_at	1.09028	0.0165314	Tars2	threonyl-tRNA synthetase 2, mitochondrial (putative)
1427170_at	-1.09022	0.00960613	Psma8	proteasome (prosome, macropain) subunit, alpha type, 8
1435379_at	1.09016	0.00296867	Urb2	URB2 ribosome biogenesis 2 homolog (S. cerevisiae)
1455021_at	-1.09013	0.024514	Gabbr1	gamma-aminobutyric acid (GABA) B receptor, 1
1438755_at	-1.08952	0.0157611	C80068	expressed sequence C80068
1424019_at	1.0891	0.00987064	Nop2	NOP2 nucleolar protein homolog (yeast)
1433860_at	1.08909	0.0253486	6030458C11Rik	RIKEN cDNA 6030458C11 gene
1449935_a_at	1.08867	0.0106464	Dnaja3	DnaJ (Hsp40) homolog, subfamily A, member 3
1418127_a_at	1.08794	0.00878649	Aifm1	apoptosis-inducing factor, mitochondrion-associated 1
1418372_at	1.08722	0.0445928	Adsl	adenylosuccinate lyase
1423697_at	1.08663	0.0113743	Psmd6	proteasome (prosome, macropain) 26S subunit, non-ATPase, 6
1424966_at	-1.08628	0.00966791	Tmem40	transmembrane protein 40
1455053_a_at	1.08597	0.00426728	Dcun1d1	DCN1, defective in cullin neddylation 1, domain containing 1 (S. cerevisiae)
1455157_a_at	1.0855	0.0286973	Fam38a	family with sequence similarity 38, member A
1448799_s_at	1.0842	0.0267104	Mrps12	mitochondrial ribosomal protein S12
1416177_at	1.08337	0.0140217	Rbmxl1	RNA binding motif protein, X linked-like-1
1440640_at	-1.08327	0.0402284	2010111I01Rik	RIKEN cDNA 2010111I01 gene
1448079_at	-1.08292	0.0357754	Rnf166	ring finger protein 166
1416393_at	1.08197	0.021407	Emg1	EMG1 nucleolar protein homolog (S. cerevisiae)
1424313_a_at	1.08178	0.024545	Ndufs7	NADH dehydrogenase (ubiquinone) Fe-S protein 7
1458148_at	1.08162	0.0278062	Nlrc3	NLR family, CARD domain containing 3
1417635_at	1.08143	0.00355749	Spa17	sperm autoantigenic protein 17
1441823_at	-1.0811	0.0331371	Zmiz1	zinc finger, MIZ-type containing 1
1420710_at	-1.08076	0.00916973	Rel	reticuloendotheliosis oncogene
1433609_s_at	1.08066	0.0427547	Surf2	surfeit gene 2
1431175_at	1.08039	0.0149136	1810019D21Rik	RIKEN cDNA 1810019D21 gene
1429161_at	1.07983	0.00329376	Arv1	ARV1 homolog (yeast)
1451398_at	1.07971	0.00741449	Cbr4	carbonyl reductase 4
1437513_a_at	-1.07945	0.0130094	Serinc1	serine incorporator 1
1441843_s_at	1.07942	0.0292276	5230400M03Rik	RIKEN cDNA 5230400M03 gene
1450337_a_at	1.07916	0.0344261	Nek8	NIMA (never in mitosis gene a)-related expressed kinase 8
1451442_at	1.07855	0.0110142	Ccdc104	coiled-coil domain containing 104
1430079_at	1.07844	0.0214921	5033406O09Rik	RIKEN cDNA 5033406O09 gene
1416028_a_at	1.07804	0.027895	Hn1	hematological and neurological expressed sequence 1
1458156_at	-1.07789	0.0176317	E230012J19Rik	RIKEN cDNA E230012J19 gene
1433450_at	-1.07769	0.00721622	Cdk5r1	cyclin-dependent kinase 5, regulatory subunit 1 (p35)
1426475_at	1.07764	0.0265291	Hmbs	hydroxymethylbilane synthase
1449481_at	1.07709	0.0278382	Slc25a13	solute carrier family 25 (mitochondrial carrier, adenine nucleotide translocator), member 13
1426447_at	1.0766	0.0140219	Nup35	nucleoporin 35
1428468_at	1.07646	0.00604276	3110043O21Rik	RIKEN cDNA 3110043O21 gene
1439935_at	-1.07641	0.00247009	Plac1l	placenta-specific 1-like
1448555_at	1.0759	0.0130748	Rpap3	RNA polymerase II associated protein 3
1440835_at	1.07541	0.00275165	Zfp27	zinc finger protein 27
1435369_at	1.07516	0.0181316	Fastkd5	FAST kinase domains 5
1418371_at	1.07515	0.031637	Dynll2	dynein light chain LC8-type 2
1424182_at	1.07509	0.0348031	Acat1	acetyl-Coenzyme A acetyltransferase 1
1438164_x_at	-1.07479	0.0471533	Flot2	flotillin 2
1443794_x_at	1.07401	0.0187893	Noc4l	nucleolar complex associated 4 homolog (S. cerevisiae)
1424588_at	-1.07395	0.00423629	Srgap3	SLIT-ROBO Rho GTPase activating protein 3
1450986_at	1.0739	0.0226166	Nop58	NOP58 ribonucleoprotein homolog (yeast)
[truncated: 244 more rows]
